# **Isolation and characterization of Streptomyces bacteriophages and Streptomyces strains encoding biosynthetic arsenals**

## **Streptomyces strains and phages for antibiotic discovery**

Elizabeth T. Montaña, Jason F. Nideffer, Lauren Brumage, Marcella Erb, Alan I. Derman, John Paul Davis, Elena Estrada, Sharon Fu, Danielle Le, Aishwarya Vuppala, Cassidy Tran, Elaine Luterstein, Shivani Lakkaraju, Sriya Panchagnula, Caroline Ren, Jennifer Doan, Sharon Tran, Jamielyn Soriano, Yuya Fujita, Pranathi Gutala, Quinn Fujii, Minda Lee, Anthony Bui, Carleen Villarreal, Samuel R. Shing, Sean Kim, Danielle Freeman, Vipula Racha, Alicia Ho, Prianka Kumar, Kian Falah, Thomas Dawson, Eray Enustun, Amy Prichard, Ana Gomez, Kanika Khanna, Shelly Trigg, Kit Pogliano, Joe Pogliano\*

Division of Biological Sciences, University of California, San Diego, La Jolla, California, USA.

\* Corresponding author: [jpogliano@ucsd.edu](mailto:jpogliano@ucsd.edu)

## Abstract

The threat to public health posed by drug-resistant bacteria is rapidly increasing, as some of healthcare's most potent antibiotics are becoming obsolete. Approximately two-thirds of the world's antibiotics are derived from natural products produced by *Streptomyces* encoded biosynthetic gene clusters. Thus, in order to identify novel gene clusters, we sequenced the genomes of four bioactive *Streptomyces* strains isolated from the soil in San Diego County and used Bacterial Cytological Profiling adapted for agar plate culturing in order to examine the mechanisms of bacterial inhibition exhibited by these strains. In the four strains, we identified 101 biosynthetic gene clusters. Some of these clusters were predicted to produce previously studied antibiotics; however, the known mechanisms of these molecules could not fully account for the antibacterial activity exhibited by the strains, suggesting that novel clusters might encode antibiotics. When assessed for their ability to inhibit the growth of clinically isolated pathogens, three *Streptomyces* strains demonstrated activity against methicillin-resistant *Staphylococcus aureus*. Additionally, due to the utility of bacteriophages for genetically manipulating bacterial strains via transduction, we also isolated four new phages (BartholomewSD, IceWarrior, Shawty, and TrvxScott) against *S. platensis*. A genomic analysis of our phages revealed nearly 200 uncharacterized proteins, including a new site-specific serine integrase that could prove to be a useful genetic tool. Sequence analysis of the *Streptomyces* strains identified CRISPR-Cas systems and specific spacer sequences that allowed us to predict phage host ranges. Ultimately, this study identified *Streptomyces* strains with the potential to produce novel chemical matter as well as integrase-encoding phages that could potentially be used to manipulate these strains.

## Introduction

Antibiotic discovery is an international priority requiring immediate action.<sup>1</sup> The increasing prevalence of multi-drug resistant (MDR) bacterial pathogens has resulted in an increased use of last-resort antibiotics.<sup>1-3</sup> Microbes that produce natural products are the most prolific source of clinically approved antibiotics.<sup>4</sup> In particular, soil dwelling Actinobacteria, notably Streptomyces, account for two-thirds of the antibiotics currently on the market.<sup>5-7</sup> Despite intensive studies, however, the full potential of microbes to produce natural products has not been realized.<sup>8</sup> Genome mining studies have shown that microbes encode many biosynthetic gene clusters (BGCs) that have not yet been characterized.<sup>8</sup> It is widely assumed that many of these clusters produce novel natural products and that further characterization of Streptomyces bacteria increases the probability of identifying molecules with unique chemical structures and new mechanisms of action.<sup>9</sup>

In addition to identifying Streptomyces strains containing potentially novel BGCs, it is necessary to improve on the conventional approaches used in natural product antibiotic discovery. One of the major stumbling blocks in natural product discovery is dereplication, since the isolation of bioactive molecules often yields antibiotics that have previously been discovered.<sup>10</sup> We recently developed Bacterial Cytological Profiling (BCP) as a new whole-cell screening technique that can be used to rapidly identify the mechanism of action (MOA) of antibiotics.<sup>11-16</sup> BCP can accurately identify the pathway inhibited by antibacterial compounds present in unfractionated crude organic extracts and can be used to guide the purification of molecules with specific bioactivities.<sup>11, 15</sup> BCP can also be used to screen bacterial strains directly on petri plates in order to identify and prioritize those strains that produce molecules with desired MOA.<sup>15</sup> In effect, BCP helps with the problem of dereplication by allowing for the determination of the MOA of

antibiotics synthesized by a particular *Streptomyces* strain before labor-intensive antibiotic purification efforts are performed.

Since many BGCs are not expressed under laboratory conditions, genetic methods are often used to augment their expression and facilitate the identification and purification of their products.<sup>17</sup> Sometimes, increased expression can be achieved using techniques such as CRISPR/Cas or plasmid cloning and overexpression.<sup>17</sup> However, there is still an occasional need to move large chromosomal regions from one strain to another via transduction in order to engineer strains optimally suited for antibiotic production. Transduction requires a phage capable of infecting the strain(s) of interest. Moreover, because phages generally display narrow host ranges<sup>18</sup> and relatively few *Streptomyces* phages have been isolated<sup>19</sup> compared to the large number of studied *Streptomyces* bacteria,<sup>20</sup> phages aptly suited for genetic manipulations are not available for the majority of antibiotic producing *Streptomyces* strains isolated. In addition, phage derived enzymes such as recombinases and integrases can also be used to engineer new strains.<sup>21-25</sup> Thus, studying the phages that infect antibiotic-producing *Streptomyces* strains could not only yield new transducing phages but potentially also new genetic tools for strain engineering.

Here we describe the isolation and characterization of *Streptomyces* strains and phages. We used a combination of bioinformatics and BCP to characterize the antibiotic biosynthetic potential of four *Streptomyces* strains that displayed an ability to inhibit Gram-negative and Gram-positive growth. Additionally, we isolated four new phages and assessed their abilities to infect our *Streptomyces* strains, which contained many CRISPRs. The proteins encoded by the phages were subjected to bioinformatic analyses in order to identify putative integrases that might be used for genetic manipulations. This work highlights a novel set of gene clusters and

Streptomyces sp. phages that serve as a starting point for the isolation of potentially novel natural products.

## Results and Discussion

### *Isolation and Antibacterial Activities of Streptomyces sp.*

To identify Streptomyces strains containing potentially novel BGCs, we collected 28 unique soil samples from sites across San Diego County. From these samples, we isolated a total of eight bacterial strains that were determined, based on 16s RNA sequencing, to be members of the Streptomyces genus (Fig 1, Table 1). These strains (designated JS, DF, QF2, EDE, SK, AH, ELW, and SFW) and two known species (*Streptomyces coelicolor* A3(2) and *Streptomyces platensis* AB045882) were screened using the cross-streak method for their ability to inhibit the growth of wild type *E. coli* MC4100, an efflux defective mutant *E. coli* JP313  $\Delta tolC$ , and *B. subtilis* PY79. Since the production of bioactive secondary metabolites is highly dependent on growth conditions,<sup>26</sup> this screen was conducted on actinomycete isolation agar (AIA) as well as LB agar. Each of the 10 strains proved capable of inhibiting the growth of *E. coli* and/or *B. subtilis* on at least one of the tested media (Fig 2), suggesting that these strains likely produce antibiotics. As expected, however, the production of antibiotics often depended upon whether the strain was grown on AIA or LB agar. For example, strain ELW was incapable of inhibiting the growth of Gram-negative and Gram-positive bacteria when grown on AIA. However, when grown on LB agar, strain ELW inhibited the growth of both Gram-negative and Gram-positive bacteria. Conversely, strains JS and QF2 exhibited growth inhibition regardless of the media on which they were grown.

**Fig 1. Phylogenetic tree of Streptomyces bacteria isolated from soil samples.** This tree was constructed using PCR-amplified 16S rRNA sequences and was generated from a multiple sequence alignment using a neighbor-joining algorithm. The scale bar (0.03) indicates substitutions per nucleotide.

**Table 1. Top NCBI BlastN hits of the 16S rRNA gene sequences.**

| Sample ID             | NCBI BlastN Top 16S ribosomal RNA Hit Description | Max Score | Total Score | Query Cover | E value | Percent Identity | Accession No. |
|-----------------------|---------------------------------------------------|-----------|-------------|-------------|---------|------------------|---------------|
| S. platensis JCM 4662 | Streptomyces platensis strain JCM 4662            | 2748      | 2748        | 100%        | 0       | 100%             | NR_024761.1   |
| S. coelicolor A3(2)   | Streptomyces coelestis strain AS 4.1594           | 2793      | 2793        | 98%         | 0       | 99.93%           | NR_027222.1   |
| JS                    | Streptomyces rochei strain NRRL B-1559            | 2741      | 2741        | 91%         | 0       | 99.93%           | NR_116078.1   |
| DF                    | Streptomyces fulvissimus strain DSM 40593         | 2691      | 2691        | 100%        | 0       | 99.93%           | NR_103947.1   |
| QF2                   | Streptomyces californicus strain NBRC 12750       | 2699      | 2699        | 100%        | 0       | 100%             | NR_112257.1   |
| EDE                   | Streptomyces pratensis strain ch24                | 1238      | 1238        | 99%         | 0       | 98.99%           | NR_125616.1   |
| SK                    | Streptomyces californicus strain NBRC 12750       | 1242      | 1242        | 100%        | 0       | 100%             | NR_112257.1   |
| AH                    | Streptomyces pratensis strain ch24                | 1194      | 1194        | 100%        | 0       | 100%             | NR_125616.1   |
| ELW                   | Streptomyces atratus strain NRRL B-16927          | 1138      | 1138        | 100%        | 0       | 99.84%           | NR_043490.1   |
| SFW                   | Streptomyces caviscabies strain ATCC 51928        | 2767      | 2767        | 100%        | 0       | 99.87%           | NR_114493.1   |

**Fig 2. Inhibition of bacterial growth by Streptomyces isolates.** The cross-streak method was used to measure the zone of inhibition among ten Streptomyces strains against two Gram-negative *E. coli* strains (MC4100 WT, JP313  $\Delta toIC$ ), and Gram-positive *B. subtilis* PY79 on (a) LB and (b) actinomycete isolation agar (AIA). Error bars represent the standard deviation of three independent trials.

### *Mechanistic Analysis of Natural Products Produced by Four Streptomyces Isolates*

Strains QF2, JS, SFW and DF all inhibited the growth of *E. coli*  $\Delta toIC$  when grown on either AIA or LB agar, but in each case, the mechanism underlying inhibition was unknown. Thus, we utilized BCP to examine the mechanism of growth inhibition exhibited by the antibacterial natural products synthesized by these four Streptomyces isolates. Each of the four strains was grown on three different media (LB, AIA, or ISP2) for 5 days to allow for the synthesis and excretion of natural products into the surrounding agar. We then added exponentially growing *E. coli* cells adjacent to the Streptomyces lawn. After two hours of incubation at 30°C, the *E. coli* cells were stained with fluorescent dyes and imaged with high resolution fluorescence microscopy. *E. coli* cells incubated adjacent to each of the four Streptomyces isolates displayed characteristic cytological profiles that, in some cases, allowed for the classification of these strains according to the MOA of the natural products they produced (Fig 3).

**Fig 3. BCP phenotypes of *E. coli* JP313  $\Delta tolC$  exposed to natural products produced by four *Streptomyces* soil isolates grown on different solid media.** Also displayed, are *E. coli* JP313  $\Delta tolC$  untreated controls grown on the tested media (LB agar, AIA, and ISP2 agar). White arrows indicate cells with three chromosomes. BCP images were collected after staining the cells with FM4-64 (red), DAPI (blue), and SYTOX-green (green). The scale bar represents one micron.

When grown on either LB or ISP2, strain QF2 synthesized an antibiotic that caused the DNA of affected *E. coli* cells to assume a toroidal conformation (Fig 3). This phenotype is characteristic of bacteria treated with protein synthesis inhibitors such as chloramphenicol,<sup>11, 27</sup> and thus, we concluded that strain QF2 is capable of synthesizing a translation-inhibiting natural product. QF2 also produced a membrane-active secondary metabolite, evidenced by visible membrane abnormalities as well as Sytox Green permeability under all tested nutrient conditions (Fig 3). Strain JS appeared to induce similar phenotypes in *E. coli*, though under different growth conditions; protein synthesis inhibition phenotypes were observed on AIA and ISP2 but not on LB. And, as was the case with strain QF2, Sytox Green permeability was observed in some cells regardless of the medium on which strain JS was grown.

Strain SFW induced distinct phenotypes in *E. coli* cells under each of the three nutrient conditions (Fig 3). On LB, a significant number of *E. coli* cells grown in the presence of strain SFW appeared to contain three chromosomes (white arrows), a phenotype that was not present in the untreated control cells. When strain SFW was grown on AIA, the *E. coli* cells became bent and lost their characteristic rod shape. Finally, strain SFW grown on ISP2 induced substantial swelling in *E. coli* cells that ultimately led to lysis. Notably, *E. coli* cells grown in the presence of strain DF exhibited nearly these same phenotypes under identical growth conditions, suggesting that these two strains produce compounds targeting similar pathways.

# *Genomic Analysis of Four Streptomyces Isolates*

In order to better understand how strains QF2, JS, SFW and DF inhibited bacterial growth, we sequenced their genomes and aligned them to the most similar genomes in the NCBI database (Fig 4A). Sequence reads for strain DF were assembled into a single contig that was most similar to the genome of *S. fulvissimus* DSM 40593. Sequencing of strains QF2, JS, and SFW yielded multiple contigs that were aligned to the genomes of *S. globisporus* C-1027, *S. parvulus* 12434, *S. pratensis* ATCC 33331, respectively.

**Fig 4. Genome characteristics of Streptomyces strains DF, SFW, QF2, and JS isolated from soil samples.** (a) Circularized representations of the linear genomes of the four bacterial isolates represented by the assembled contigs obtained from genome sequencing. (b) Genomes oriented according to their threonine operons (dark blue). Predicted biosynthetic gene clusters (light blue), loci of Cas-associated protein-coding genes (green), and CRISPR arrays (purple) are shown. (c) A Venn diagram displaying the numbers of BGCs that are shared by and unique to the genomes of our isolates. Five clusters of particular importance are explicitly named.

In order to identify predicted gene clusters associated with secondary metabolism, the assembled genome sequences for strains QF2, JS, SFW and DF were annotated using RASTtk<sup>28</sup> and submitted to AntiSMASH 5.0<sup>29</sup> (Fig 4B). Each strain encoded between 18 and 34 BGCs, some of which were present in multiple strains (Fig 4C). Additionally, some of the encoded clusters closely resembled known BGCs in the MIBig repository.<sup>30</sup> For example, of the 23 putative BGCs identified in the genome of strain QF2 (Table 2), one of them (cluster 21) was similar to the viomycin BGC (Fig 5A). Viomycin inhibits protein synthesis by stabilizing tRNAs in the A site of the bacterial ribosome, inhibiting translocation.<sup>31</sup> According to AntiSMASH, 66% of the genes within the viomycin BGC were similar to genes within cluster 21. However, a global pairwise alignment of cluster 21 and the viomycin BGC revealed that the nucleotide sequence of cluster 21 is actually 98.5% identical over 32.5kb of the 36kb viomycin BGC (Fig 5A). This suggests that a viomycin related molecule is synthesized by strain QF2 and may account for



strain's ability to inhibit protein synthesis in *E. coli* (Fig 3). While some of the other clusters in the QF2 genome (Table 2: clusters 2, 4, 7, 8, 9, 12, 13, 22) have significant similarity to known BGCs, no other clusters appear to produce known antibiotics.

**Table 2. BGCs encoded within the draft genome sequence of strain QF2.**

| Strain - QF2 |                                   |                                                             |                                    |              |         |         |              |
|--------------|-----------------------------------|-------------------------------------------------------------|------------------------------------|--------------|---------|---------|--------------|
| Cluster      | Type                              | Most Similar MiBIG Cluster and Predicted Percent Similarity | Antibacterial Activity             | MiBIG BGC-ID | Minimum | Maximum | Length (nt.) |
| 1            | butyrolactone                     | Coelimycin P1 T1PKS (8%)                                    |                                    | BGC0000038   | 28795   | 39496   | 10702        |
| 2            | terpene                           | Geosmin Terpene (100%)                                      |                                    | BGC0001181   | 60346   | 82527   | 22182        |
| 3            | NRPS                              | Griseobactin NRPS (35%)                                     |                                    | BGC0000368   | 101394  | 123548  | 22155        |
| 4            | NRPS                              | Coelichelin NRPS (72%)                                      |                                    | BGC0000325   | 123549  | 145157  | 21609        |
| 5            | T3PKS                             | Herboxidiene T1PKS, T3PKS (6%)                              |                                    | BGC0001065   | 184513  | 202853  | 18341        |
| 6            | terpene                           | Isorenieratene Terpene (57%)                                |                                    | BGC0000664   | 681001  | 697369  | 16369        |
| 7            | ectoine                           | Ectoine Other (75%)                                         |                                    | BGC0000853   | 1125565 | 1134445 | 8881         |
| 8            | T2PKS                             | Griseorhodin T2PKS (69%)                                    |                                    | BGC0000230   | 1908342 | 1950906 | 42565        |
| 9            | siderophore                       | Desferrioxamine B Siderophore (80%)                         |                                    | BGC0000941   | 2278919 | 2290697 | 11779        |
| 10           | LAP,thiopeptide                   | -                                                           | -                                  | -            | 2690041 | 2722548 | 32508        |
| 11           | ectoine, butyrolactone            | Showdomycin Other (47%)                                     | Nucleic Acid and Protein Synthesis | BGC0001778   | 3344033 | 3359401 | 15369        |
| 12           | melanin                           | Melanin Other (100%)                                        |                                    | BGC0000911   | 4777563 | 4787988 | 10426        |
| 13           | lanthipeptide                     | AmfS Lanthipeptide (100%)                                   |                                    | BGC0000496   | 5105643 | 5127766 | 22124        |
| 14           | terpene                           | -                                                           | -                                  | -            | 5476141 | 5497007 | 20867        |
| 15           | siderophore                       | Ficellomycin NRPS (3%)                                      | DNA Replication                    | BGC0001593   | 5881146 | 5896034 | 14889        |
| 16           | NRPS                              | Vioprolide A NRPS (25%)                                     |                                    | BGC0001822   | 6093895 | 6137611 | 43717        |
| 17           | bacteriocin                       | -                                                           | -                                  | -            | 6194201 | 6205608 | 11408        |
| 18           | NRPS-like                         | -                                                           | -                                  | -            | 6430967 | 6442494 | 11528        |
| 19           | NRPS-like, ladderane, arylpolyene | Skyllamycin NRPS (14%)                                      | Unknown MOA                        | BGC0000429   | 6608620 | 6645073 | 36454        |
| 20           | terpene                           | Hopene Terpene (46%)                                        |                                    | BGC0000663   | 6755130 | 6764031 | 8902         |
| 21           | NRPS, T1PKS                       | Viomycin NRPS (66%)                                         | Protein Synthesis                  | BGC0000458   | 6806327 | 6870853 | 64527        |
| 22           | T3PKS                             | Alkylresorcinol T3PKS (66%)                                 | Unknown MOA                        | BGC0000282   | 7058484 | 7080991 | 22508        |
| 23           | lassopeptide                      | -                                                           | -                                  | -            | 7260793 | 7282889 | 22097        |

The most similar BGCs in the MiBIG database are listed, as well as the percentage of genes in each MiBIG known cluster that have similarity to genes in the corresponding QF2 cluster. In cases where the most similar known BGC produces an antibiotic, the MOA was listed (Showdomycin,<sup>32</sup> Ficellomycin,<sup>33</sup> Skyllamycin,<sup>34</sup> Viomycin,<sup>31</sup> Alkylresorcinol<sup>35</sup>).

**Fig 5. Comparison of BGCs encoded in the genomes of bacterial soil isolates and the predicted most similar, previously characterized BGC with an antibacterial product.** (a) Strain QF2, BGC 21, compared to the BGC previously described to produce the antibiotic viomycin (NCBI Acc No. AY263398.1), encoded in the WGS of *S. vinaceus* ATCC 11861. (b) Strain JS, BGC 7, compared to the BGC previously described to produce the antibacterial sesquiterpene Albaflavenone (NCBI Acc No. AL645882.2), encoded in the WGS of *S. coelicolor* A3(2). (c) Strain SFW, BGC 1, compared to the BGC previously described to produce the antibacterial beta-lactam Carbapenem MM 4550 (NCBI Acc No. KF042303.1), encoded in the WGS of *S. argenteolus* ATCC 11009. (d) Strain DF, BGC 27, compared to the BGC previously described to produce the ammonium ionophore antibiotic Nonactin (NCBI Acc No. AF074603.2), encoded in the WGS of *S. griseus subsp. griseus* ETH A7796. Cluster comparisons were constructed in Easyfig. Regions of nucleotide homology are indicated on a gray scale and genes are colored according to the putative function of the corresponding protein product.

Strain JS contained 18 putative BGCs, six of which shared significant similarity (>60% of genes in common) with a known cluster (Table 3). Of these six, however, only cluster 7 was predicted

to produce an antibiotic. All of the genes constituting a known terpene cluster that produces albaflavenone were present in cluster 7 (Fig 5B). Albaflavenone is capable of inhibiting the growth of *B. subtilis* by an unknown MOA<sup>36</sup> and has previously been isolated from *S. coelicolor* A3(2),<sup>37</sup> a close relative of strain JS. Since the MOA of albaflavenone is unknown, it's not clear whether the products of cluster 7 or of a different cluster are responsible for the inhibition of protein synthesis and/or the membrane permeability observed in *E. coli* (Fig 3).

**Table 3. BGCs encoded within the draft genome sequence of strain JS.**

| Strain - JS |                      |                                                             |                                             |              |         |         |              |  |  |
|-------------|----------------------|-------------------------------------------------------------|---------------------------------------------|--------------|---------|---------|--------------|--|--|
| Cluster     | Type                 | Most Similar MiBIG Cluster and Predicted Percent Similarity | Antibacterial Activity                      | MiBIG BGC-ID | Minimum | Maximum | Length (nt.) |  |  |
| 1           | T3PKS                | Herboxidiene T1PKS, T3PKS (7%)                              |                                             | BGC0001065   | 214109  | 229085  | 14977        |  |  |
| 2           | ectoine              | Ectoine Other (100%)                                        |                                             | BGC0000853   | 672467  | 682865  | 10399        |  |  |
| 3           | melanin              | Melanin Other (60%)                                         |                                             | BGC0000911   | 1414668 | 1425276 | 10609        |  |  |
| 4           | siderophore          | Desferrioxamine B Siderophore (66%)                         | Potentially Inhibits Cell Wall Biosynthesis | BGC0000941   | 1507497 | 1519344 | 11848        |  |  |
| 5           | furan                | Methylenomycin Other (9%)                                   |                                             | BGC0000914   | 2667706 | 2688702 | 20997        |  |  |
| 6           | NRPS                 | Ansamitocin P-3 T1PKS (7%)                                  |                                             | BGC0001511   | 3021294 | 3076234 | 54941        |  |  |
| 7           | terpene              | Albaflavenone Terpene (100%)                                | Unknown MOA                                 | BGC0000660   | 3743916 | 3764845 | 20930        |  |  |
| 8           | T2PKS                | Spore pigment T2PKS (66%)                                   |                                             | BGC0000271   | 3800219 | 3857023 | 56805        |  |  |
| 9           | siderophore          | -                                                           | -                                           | -            | 4274698 | 4286154 | 11457        |  |  |
| 10          | bacteriocin          | -                                                           | -                                           | -            | 4471015 | 4482384 | 11370        |  |  |
| 11          | terpene              | -                                                           | -                                           | -            | 4488880 | 4508472 | 19593        |  |  |
| 12          | NRPS                 | Lipopeptide 8D1-1 & 8D1-2 NRPS (25%)                        | PMF Collapse                                | BGC0001370   | 4616241 | 4669719 | 53479        |  |  |
| 13          | NRPS                 | Lipopeptide 8D1-1 & 8D1-2 NRPS (15%)                        | PMF Collapse                                | BGC0001370   | 4929292 | 4967094 | 37803        |  |  |
| 14          | terpene              | Hopene Terpene (76%)                                        |                                             | BGC0000663   | 5042481 | 5069167 | 26687        |  |  |
| 15          | terpene              | Lysolipin T2PKS (4%)                                        | Cell Wall Biosynthesis                      | BGC0000242   | 5088579 | 5103665 | 15087        |  |  |
| 16          | T1PKS                | Candicidin T1PKS (28%)                                      |                                             | BGC0000034   | 5331251 | 5350185 | 18935        |  |  |
| 17          | T2PKS, butyrolactone | Kinamycin T2PKS (25%)                                       | DNA Synthesis                               | BGC0000236   | 5370217 | 5395391 | 25175        |  |  |
| 18          | T1PKS                | FR-008/Levorin A3 T1PKS (28%)                               |                                             | BGC0000061   | 5395392 | 5413565 | 18174        |  |  |

The most similar BGCs in the MiBIG database are listed, as well as the percentage of genes in each MiBIG known cluster that have similarity to genes in the corresponding JS cluster. In cases where the most similar known BGC produces an antibiotic, the MOA was listed (Methylenomycin,<sup>38</sup> Albaflavenone,<sup>36</sup> Lipopeptide 8D1-1 & 8D1-2,<sup>39</sup> Lysolipin,<sup>40</sup> Kinamycin<sup>41</sup>).

Of the 26 putative BGCs that were identified in the genome of strain SFW, only one cluster shared a high percentage of genes in common with a known antibiotic-producing cluster (Table 4). Cluster 1 shared similarity with 62% of the genes within a known BGC that produces carbapenems (Fig 5C), a class of beta-lactam antibiotics that inhibit cell wall biogenesis.<sup>42</sup> Additionally, cluster 4 contained a low percentage of genes in common with a BGC involved in the synthesis of clavulanic acid, which inhibits beta-lactamase and consequently strengthens the bactericidal activity of beta-lactams. Cluster 1 (and perhaps cluster 4) could, therefore,

contribute to the synthesis of bioactive molecules that account for the inhibition of *E. coli* cell wall biogenesis on ISP2 media (Fig 3).

**Table 4. BGCs encoded within the draft genome sequence of strain SFW.**

| Strain - SFW |                  |                                                             |                           |              |         |         |              |
|--------------|------------------|-------------------------------------------------------------|---------------------------|--------------|---------|---------|--------------|
| Cluster      | Type             | Most Similar MiBIG Cluster and Predicted Percent Similarity | Antibacterial Activity    | MiBIG BGC-ID | Minimum | Maximum | Length (nt.) |
| 1            | NRPS, blactam    | Carbapenem MM 4550 Other (62%)                              | Cell Wall Biosynthesis    | BGC0000842   | 280243  | 420495  | 140253       |
| 2            | NRPS             | Coelichelin NRPS (90%)                                      |                           | BGC0000325   | 537068  | 587954  | 50887        |
| 3            | terpene          | Isorenieratene Terpene (28%)                                |                           | BGC0000664   | 601924  | 615201  | 13278        |
| 4            | blactam          | Clavulanic acid Other (20%)                                 | Beta-lactamase Inhibition | BGC0000845   | 839861  | 863248  | 23388        |
| 5            | terpene          | Hopene Terpene (69%)                                        |                           | BGC0000663   | 920123  | 946635  | 26513        |
| 6            | T1PKS            | Sceliphrolactam T1PKS (72%)                                 |                           | BGC0001770   | 1325302 | 1388343 | 63042        |
| 7            | bacteriocin      | -                                                           | -                         | -            | 1598693 | 1609196 | 10504        |
| 8            | lanthipeptide    | Kanamycin Saccharide (1%)                                   | Protein Synthesis         | BGC0000703   | 1734703 | 1760347 | 25645        |
| 9            | NRPS             | Lipopeptide 8D1-1 & 8D1-2 NRPS (6%)                         | PMF Collapse              | BGC0001370   | 1773501 | 1830128 | 56628        |
| 10           | siderophore      | Ficellomycin NRPS (3%)                                      | DNA replication           | BGC0001593   | 2107372 | 2120491 | 13120        |
| 11           | terpene          | -                                                           | -                         | -            | 2186197 | 2205874 | 19678        |
| 12           | butyrolactone    | Lactonamycin T2PKS (3%)                                     | Protein Synthesis         | BGC0000238   | 4018281 | 4029096 | 10816        |
| 13           | NRPS             | Istamycin Saccharide (11%)                                  | Protein Synthesis         | BGC0000700   | 4251191 | 4307412 | 56222        |
| 14           | siderophore      | Desferrioxamine B Siderophore (83%)                         |                           | BGC0000941   | 4924798 | 4936579 | 11782        |
| 15           | lanthipeptide    | -                                                           | -                         | -            | 5321361 | 5346350 | 24990        |
| 16           | terpene          | -                                                           | -                         | -            | 5588840 | 5608518 | 19679        |
| 17           | ectoine          | Ectoine Other (100%)                                        |                           | BGC0000853   | 6072388 | 6080990 | 8603         |
| 18           | T2PKS, PKS-like  | Cinerubin B T2PKS (25%)                                     | DNA Intercalation         | BGC0000212   | 6443938 | 6515214 | 71277        |
| 19           | terpene          | Steffimycin T2PKS-Saccharide (16%)                          |                           | BGC0000273   | 6560271 | 6580717 | 20447        |
| 20           | terpene, ectoine | Ectoine Other (100%)                                        |                           | BGC0000853   | 6860752 | 6881669 | 20918        |
| 21           | bacteriocin      | -                                                           | -                         | -            | 6909859 | 6920014 | 10156        |
| 22           | T3PKS            | Tetronasin T1PKS (11%)                                      | PMF Collapse              | BGC0000163   | 7071589 | 7112647 | 41059        |
| 23           | melanin          | Melanin Other (100%)                                        |                           | BGC0000911   | 7208921 | 7219385 | 10465        |
| 24           | T2PKS, terpene   | Spore pigment T2PKS (83%)                                   |                           | BGC0000271   | 7244899 | 7317424 | 72526        |
| 25           | NRPS             | Rimosamide NRPS (21%)                                       |                           | BGC0001760   | 7458615 | 7511513 | 52899        |
| 26           | butyrolactone    | -                                                           | -                         | -            | 7592249 | 7602533 | 10285        |

The most similar BGCs in the MiBIG database are listed, as well as the percentage of genes in each MiBIG known cluster that have similarity to genes in the corresponding SFW cluster. In cases where the most similar known BGC produces an antibiotic, the MOA was listed (Carbapenem,<sup>43</sup> Clavulanic acid,<sup>44</sup> Kanamycin,<sup>45</sup> Lipopeptide 8D1-1 & 8D1-2,<sup>39</sup> Ficellomycin,<sup>33</sup> Lactonamycin,<sup>46, 47</sup> Istamycin,<sup>48-50</sup> Cinerubin,<sup>51</sup> Tetronasin<sup>52</sup>).

Strain DF encoded 34 BGCs (Table 5). Despite this rich supply of BGCs, however, we were only able to identify one cluster that likely participates in the synthesis of an antibiotic with a confirmed MOA. According to AntiSMASH v5.0, cluster 27 shared 85% gene identity with a known BGC that produces nonactin, a bioactive ionophore that disrupts membrane potential<sup>53</sup> (Fig 5D). The known clusters could not fully account for the antibacterial activity exhibited by strain DF (Fig 3), suggesting that antibiotics might be produced by novel clusters.

**Table 5. BGCs encoded within the closed genome sequence of strain DF.**

| Strain - DF |                          |                                                             |                                              |              |         |         |             |
|-------------|--------------------------|-------------------------------------------------------------|----------------------------------------------|--------------|---------|---------|-------------|
| Cluster     | Type                     | Most Similar MiBIG Cluster and Predicted Percent Similarity | Antibacterial Activity                       | MiBIG BGC-ID | Minimum | Maximum | Length (nt) |
| 1           | ectoine                  | -                                                           | -                                            | -            | 55194   | 65595   | 10402       |
| 2           | butyrolactone            | Gamma-butyrolactone (100%)                                  | -                                            | BGC0000038   | 156789  | 167693  | 10905       |
| 3           | terpene                  | Geosmin Terpene (100%)                                      | -                                            | BGC0001181   | 196683  | 218891  | 22209       |
| 4           | transAT-PKS, T1PKS, NRPS | Griseobactin NRPS (82%)                                     | -                                            | BGC0000368   | 227963  | 343592  | 115630      |
| 5           | NRPS                     | Coelichelin NRPS (81%)                                      | -                                            | BGC0000325   | 363422  | 414309  | 50888       |
| 6           | NRPS                     | Arsenopolyketides Other (41%)                               | Unknown MOA                                  | BGC0001283   | 421648  | 466618  | 44971       |
| 7           | T3PKS                    | Naringenin Terpene (100%)                                   | Potentially Inhibits Fatty Acid Biosynthesis | BGC0001310   | 481558  | 522683  | 41126       |
| 8           | T2PKS                    | Granaticin T2PKS (29%)                                      | -                                            | BGC0000227   | 874325  | 916838  | 42514       |
| 9           | terpene                  | Steffimycin T2PKS-Saccharide (19%)                          | -                                            | BGC0000273   | 1079402 | 1100700 | 21299       |
| 10          | ectoine                  | Ectoine Other (100%)                                        | -                                            | BGC0000853   | 1578303 | 1588701 | 10399       |
| 11          | NRPS                     | Laspertomycin NRPS (9%)                                     | Cell Wall Biosynthesis                       | BGC0000379   | 2182777 | 2259643 | 76867       |
| 12          | siderophore              | Desferrioxamine B Siderophore (100%)                        | -                                            | BGC0000941   | 2696558 | 2708336 | 11779       |
| 13          | LAP, thiopeptide         | -                                                           | -                                            | -            | 3100604 | 3132306 | 31703       |
| 14          | NRPS                     | Microsclerodermins NRPS, T1PKS (14%)                        | -                                            | BGC0001019   | 3327941 | 3392550 | 64610       |
| 15          | betalactone              | Divergolide T1PKS (6%)                                      | -                                            | BGC0001119   | 3740002 | 3763908 | 23907       |
| 16          | T2PKS                    | Rabelomycin T2PKS-Saccharide (25%)                          | -                                            | BGC0000262   | 4318297 | 4360617 | 42321       |
| 17          | lassopeptide             | Keywimycin RiPP (100%)                                      | -                                            | BGC0001634   | 4419581 | 4442206 | 22626       |
| 18          | T1PKS                    | Streptazone E T1PKS (91%)                                   | -                                            | BGC0001296   | 4973731 | 5038740 | 65010       |
| 19          | lanthipeptide            | AmfS Lanthipeptide (100%)                                   | -                                            | BGC0000496   | 5317536 | 5340199 | 22664       |
| 20          | terpene                  | -                                                           | -                                            | -            | 5677735 | 5698600 | 20866       |
| 21          | siderophore              | -                                                           | -                                            | -            | 6150075 | 6164335 | 14261       |
| 22          | butyrolactone            | 4-formylaminooxyvinylglycine Other (21%)                    | -                                            | BGC0001488   | 6317636 | 6328541 | 10906       |
| 23          | bacteriocin              | -                                                           | -                                            | -            | 6488518 | 6499849 | 11332       |
| 24          | terpene                  | 2-methylisoborneol Terpene (100%)                           | -                                            | BGC0000658   | 6514280 | 6535368 | 21089       |
| 25          | NRPS                     | Asukamycin T2PKS (12%)                                      | Unknown MOA                                  | BGC0000187   | 6618679 | 6679113 | 60435       |
| 26          | arylpyrene               | Tetrapetalone A-D PKS (26%)                                 | Unknown MOA                                  | BGC0001798   | 6726255 | 6767369 | 41115       |
| 27          | NRPS                     | Nonactin T2PKS (85%)                                        | Dissipates Transmembrane Electric Potential  | BGC0000252   | 6774441 | 6840334 | 65894       |
| 28          | terpene                  | Hopene Terpene (69%)                                        | -                                            | BGC0000663   | 7093211 | 7119781 | 26571       |
| 29          | NRPS                     | SGR PTMs NRPS, T1PKS (100%)                                 | Unknown MOA                                  | BGC0001043   | 7204325 | 7247340 | 43016       |
| 30          | bacteriocin              | -                                                           | -                                            | -            | 7260810 | 7271608 | 10799       |
| 31          | melanin                  | Melanin Other (100%)                                        | -                                            | BGC0000911   | 7452699 | 7463166 | 10468       |
| 32          | T3PKS                    | Herboxidiene T1PKS, T3PKS (7%)                              | -                                            | BGC0001065   | 7495580 | 7536629 | 41050       |
| 33          | terpene                  | Isorenieratene Terpene (100%)                               | -                                            | BGC0000664   | 7626626 | 7652190 | 25565       |
| 34          | thiopeptide, LAP, NRPS   | Lactazole Thiopeptide (33%)                                 | -                                            | BGC0000606   | 7666072 | 7717669 | 51598       |

The most similar BGCs in the MiBIG database are listed, as well as the percentage of genes in each MiBIG known cluster that have similarity to genes in the corresponding DF cluster. In cases where the most similar known BGC produces an antibiotic, the MOA was listed (Arsenopolyketides,<sup>54</sup> Naringenin,<sup>55</sup> Laspertomycin,<sup>56</sup> Asukamycin,<sup>57</sup> Tetrapetalone,<sup>58</sup> Nonactin,<sup>53</sup> SGR PTMs NRPS<sup>59</sup>).

### Antimicrobial Activity of Four *Streptomyces* isolates Against Clinically Relevant Pathogens

In order to assess the relevance of antibiotics produced by strains JS, DF, SFW, and QF2, we screened their ability to inhibit the growth of three clinically isolated pathogens using the cross-streak method (Table 6). Both strain QF2 and strain JS inhibited the growth of methicillin-resistant *S. aureus* (MRSA) and efflux-deficient *P. aeruginosa* PA01. These strains did not, however, inhibit the growth of the wild-type clinical isolates *P. aeruginosa* PA01 and *P. aeruginosa* P4, which were resistant to the antibiotics produced by all four *Streptomyces* isolates. Strain DF, though incapable of inhibiting the growth of *E. coli* *tolC*<sup>+</sup> (Fig 2), did inhibit the growth of MRSA and efflux-deficient *P. aeruginosa* PA01. Strain SFW was the least capable

of inhibiting the growth of clinical pathogens, producing antibiotics only effective against *E. coli* *tolC*<sup>+</sup> (Fig 2).

**Table 6. Inhibition of growth of clinically relevant pathogens by Streptomyces strains DF, SFW, QF2, and JS.**

|            | Gram-Negative Bacteria |    |              | Gram-Positive Bacteria |         |   |
|------------|------------------------|----|--------------|------------------------|---------|---|
|            | <i>P. aeruginosa</i>   |    |              | <i>S. aureus</i>       |         |   |
|            | PAO1                   | P4 | PAO1 Δefflux | MRSA USA300            | TCH1516 |   |
| <b>DF</b>  | -                      | -  | +            |                        |         | + |
| <b>SFW</b> | -                      | -  | -            |                        |         | - |
| <b>QF2</b> | -                      | -  | +            |                        |         | + |
| <b>JS</b>  | -                      | -  | +            |                        |         | + |

Plus signs indicate growth inhibition, while minus signs indicate pathogen growth.

### *Phage Isolation and Genome Sequencing*

With the goal of identifying genetic tools that could be used to augment expression of the BGCs in our bacterial isolates, we decided to isolate bacteriophages using *S. platensis* as a host. This species, in particular, was chosen as a host because it is relatively well-characterized, and *S. platensis* phages capable of infecting our Streptomyces isolates could possibly be used to move (via transduction) BGCs from our isolates into a more genetically manipulatable and familiar background.<sup>60, 61</sup> Thus, to increase the probability that our *S. platensis* phages could be used for this purpose, we performed the isolation using the same soil samples from which our Streptomyces strains were obtained. Four *S. platensis* bacteriophages (BartholomewSD, IceWarrior, Shawty, and TrvxScott) were successfully isolated. These phages were imaged using negative-stain transmission electron microscopy (Fig 6A) and subsequently characterized as members of the family Siphoviridae due to their long filamentous tails and icosahedral capsids.<sup>62, 63</sup> Genome sequencing revealed that BartholomewSD (52.1 kb) and TrvxScott (52.6 kb) are 89% identical (Fig 6B) and belong to the BD2 subcluster of Streptomyces phages, which currently contains 20 other members.<sup>19</sup> IceWarrior (55.5 kb) clustered in subcluster BI1 (24 members), and

Shawty (40.7 kb) clustered in BB1, a subcluster of 7 phages that includes notable members TG1 and phiC31 (Table 7).<sup>19</sup> The BLASTp-predicted functions of the gene products encoded by these phages are shown in Table 8.

**Fig 6. Characterization of four Streptomyces phages isolated from soil samples.** (a) Electron micrographs of the four phages (IceWarrior, TrvxScott, BartholomewSD, and Shawty). Lysate samples were negatively stained and imaged with transmission electron microscopy (TEM). The scale bar represents 100 nm. (b) A whole-genome sequence comparison of the four phages generated by Phamerator (top to bottom: TrvxScott, BartholomewSD, Shawty, IceWarrior).

**Table 7. Summary of the NCBI WGS annotations of four phage isolates.**

| Bacteriophage | Taxa                     | Genome (bp) | GC%  | Genes | Cluster | Subcluster | Genbank Acc. No. |
|---------------|--------------------------|-------------|------|-------|---------|------------|------------------|
| TrvxScott     | unclass. Arequatrovirus  | 52600       | 67.8 | 81    | BD      | BD2        | MH669016         |
| IceWarrior    | unclass. Rimavirus       | 55532       | 59.5 | 86    | BI      | BI1        | MK433259         |
| BartholomewSD | unclass. Arequatrovirus  | 52131       | 67.6 | 88    | BD      | BD2        | MK460245         |
| Shawty        | unclass. Lomovskayavirus | 40733       | 63.2 | 58    | BB      | BB1        | MK433266         |



310 **Table 8. Functions of the putative proteins encoded within the genomes of four phage isolates.**

| Streptomyces Phage TrvxScott taxon:2301575 |                                        | Streptomyces phage Shawty taxon:2510521 |                                      | Streptomyces phage IceWarrior taxon:2510515 |                                             | Streptomyces phage BartholomewSD taxon:2510587 |                                                  |
|--------------------------------------------|----------------------------------------|-----------------------------------------|--------------------------------------|---------------------------------------------|---------------------------------------------|------------------------------------------------|--------------------------------------------------|
| CDS No.                                    | Product                                | CDS No.                                 | Product                              | CDS No.                                     | Product                                     | CDS No.                                        | Product                                          |
| 1                                          | hypothetical protein                   | 1                                       | terminase small subunit              | 1                                           | hypothetical protein                        | 1                                              | hypothetical protein                             |
| 2                                          | HNH endonuclease                       | 2                                       | terminase large subunit              | 2                                           | HNH endonuclease                            | 2                                              | hypothetical protein                             |
| 3                                          | thioredoxin                            | 3                                       | portal protein                       | 3                                           | hypothetical protein                        | 3                                              | HNH endonuclease                                 |
| 4                                          | terminase small subunit                | 4                                       | capsid maturation protease           | 4                                           | hypothetical protein                        | 4                                              | tRNA-Phe                                         |
| 5                                          | terminase large subunit                | 5                                       | major capsid protein                 | 5                                           | endolysin                                   | 5                                              | hypothetical protein                             |
| 6                                          | portal protein                         | 6                                       | head-to-tail adaptor                 | 6                                           | head-to-tail connector complex protein      | 6                                              | thioredoxin                                      |
| 7                                          | capsid maturation protease             | 7                                       | hypothetical protein                 | 7                                           | hypothetical protein                        | 7                                              | hypothetical protein                             |
| 8                                          | scaffolding protein                    | 8                                       | major tail protein                   | 8                                           | terminase large subunit                     | 8                                              | terminase                                        |
| 9                                          | major capsid protein                   | 9                                       | hypothetical protein                 | 9                                           | hypothetical protein                        | 9                                              | portal protein                                   |
| 10                                         | head-to-tail connector complex protein | 10                                      | tail assembly chaperone              | 10                                          | hypothetical protein                        | 10                                             | MuF-like minor capsid protein                    |
| 11                                         | head-to-tail connector complex protein | 11                                      | tail assembly chaperone              | 11                                          | hypothetical protein                        | 11                                             | scaffolding protein                              |
| 12                                         | hypothetical protein                   | 12                                      | tape measure protein                 | 12                                          | portal protein                              | 12                                             | major capsid protein                             |
| 13                                         | head-to-tail connector complex protein | 13                                      | minor tail protein                   | 13                                          | hypothetical protein                        | 13                                             | head-to-tail adaptor                             |
| 14                                         | major tail protein                     | 14                                      | minor tail protein                   | 14                                          | capsid maturation protease                  | 14                                             | head-to-tail stopper                             |
| 15                                         | tail assembly chaperone                | 15                                      | minor tail protein                   | 15                                          | hypothetical protein                        | 15                                             | hypothetical protein                             |
| 16                                         | tail assembly chaperone                | 16                                      | minor tail protein                   | 16                                          | hypothetical protein                        | 16                                             | tail terminator                                  |
| 17                                         | tape measure protein                   | 17                                      | hypothetical protein                 | 17                                          | major tail protein                          | 17                                             | major tail protein                               |
| 18                                         | minor tail protein                     | 18                                      | tail fiber                           | 18                                          | hypothetical protein                        | 18                                             | tail assembly chaperone                          |
| 19                                         | minor tail protein                     | 19                                      | lysine A                             | 19                                          | major tail protein                          | 19                                             | tail assembly chaperone                          |
| 20                                         | hypothetical protein                   | 20                                      | hypothetical protein                 | 20                                          | hypothetical protein                        | 20                                             | tape measure protein                             |
| 21                                         | hypothetical protein                   | 21                                      | deoxynucleoside monophosphate kinase | 21                                          | chitosanase                                 | 21                                             | minor tail protein                               |
| 22                                         | hypothetical protein                   | 22                                      | immunity repressor                   | 22                                          | hypothetical protein                        | 22                                             | minor tail protein                               |
| 23                                         | minor tail protein                     | 23                                      | Cas4 family exonuclease              | 23                                          | tape measure protein                        | 23                                             | hypothetical protein                             |
| 24                                         | hypothetical protein                   | 24                                      | hypothetical protein                 | 24                                          | minor tail protein                          | 24                                             | minor tail protein                               |
| 25                                         | lysine A                               | 25                                      | hypothetical protein                 | 25                                          | minor tail protein                          | 25                                             | hypothetical protein                             |
| 26                                         | hypothetical protein                   | 26                                      | hypothetical protein                 | 26                                          | hypothetical protein                        | 26                                             | hypothetical protein                             |
| 27                                         | hypothetical protein                   | 27                                      | hypothetical protein                 | 27                                          | hypothetical protein                        | 27                                             | hypothetical protein                             |
| 28                                         | hypothetical protein                   | 28                                      | hypothetical protein                 | 28                                          | hypothetical protein                        | 28                                             | lysine A                                         |
| 29                                         | hypothetical protein                   | 29                                      | hypothetical protein                 | 29                                          | holin                                       | 29                                             | hypothetical protein                             |
| 30                                         | exonuclease                            | 30                                      | HNH endonuclease                     | 30                                          | hypothetical protein                        | 30                                             | hypothetical protein                             |
| 31                                         | hypothetical protein                   | 31                                      | DNA primase                          | 31                                          | hypothetical protein                        | 31                                             | immunity repressor                               |
| 32                                         | hypothetical protein                   | 32                                      | restriction endonuclease             | 32                                          | hypothetical protein                        | 32                                             | hypothetical protein                             |
| 33                                         | hypothetical protein                   | 33                                      | DNA polymerase I                     | 33                                          | hypothetical protein                        | 33                                             | Cas4 family exonuclease                          |
| 34                                         | deoxycytidylate deaminase              | 34                                      | RNA polymerase sigma factor          | 34                                          | hypothetical protein                        | 34                                             | hypothetical protein                             |
| 35                                         | DNA helicase                           | 35                                      | hypothetical protein                 | 35                                          | hypothetical protein                        | 35                                             | hypothetical protein                             |
| 36                                         | holliday junction resolvase            | 36                                      | hypothetical protein                 | 36                                          | hypothetical protein                        | 36                                             | hypothetical protein                             |
| 37                                         | hypothetical protein                   | 37                                      | hypothetical protein                 | 37                                          | hypothetical protein                        | 37                                             | deoxycytidylate deaminase                        |
| 38                                         | DNA primase                            | 38                                      | hypothetical protein                 | 38                                          | hypothetical protein                        | 38                                             | DnaB-like helicase                               |
| 39                                         | DNA primase                            | 39                                      | hypothetical protein                 | 39                                          | hypothetical protein                        | 39                                             | holliday junction resolvase                      |
| 40                                         | hypothetical protein                   | 40                                      | ThyX-like thymidylate synthase       | 40                                          | hypothetical protein                        | 40                                             | hypothetical protein                             |
| 41                                         | hypothetical protein                   | 41                                      | hypothetical protein                 | 41                                          | hypothetical protein                        | 41                                             | DNA primase                                      |
| 42                                         | exonuclease                            | 42                                      | hypothetical protein                 | 42                                          | hypothetical protein                        | 42                                             | DNA primase                                      |
| 43                                         | hypothetical protein                   | 43                                      | thioredoxin                          | 43                                          | hypothetical protein                        | 43                                             | hypothetical protein                             |
| 44                                         | HTH DNA binding protein                | 44                                      | hypothetical protein                 | 44                                          | hypothetical protein                        | 44                                             | hypothetical protein                             |
| 45                                         | hypothetical protein                   | 45                                      | deoxycytidylate deaminase            | 45                                          | hypothetical protein                        | 45                                             | hypothetical protein                             |
| 46                                         | ribonucleotide reductase               | 46                                      | hypothetical protein                 | 46                                          | hypothetical protein                        | 46                                             | Mre11 family dsDNA break repair endo/exonuclease |
| 47                                         | DNA methylase                          | 47                                      | hypothetical protein                 | 47                                          | hypothetical protein                        | 47                                             | hypothetical protein                             |
| 48                                         | hypothetical protein                   | 48                                      | hypothetical protein                 | 48                                          | hypothetical protein                        | 48                                             | helix-turn-helix DNA binding protein             |
| 49                                         | hypothetical protein                   | 49                                      | hypothetical protein                 | 49                                          | hypothetical protein                        | 49                                             | hypothetical protein                             |
| 50                                         | hypothetical protein                   | 50                                      | hypothetical protein                 | 50                                          | hypothetical protein                        | 50                                             | ribonucleotide reductase                         |
| 51                                         | HTH DNA binding protein                | 51                                      | hypothetical protein                 | 51                                          | hypothetical protein                        | 51                                             | hypothetical protein                             |
| 52                                         | integrase                              | 52                                      | hypothetical protein                 | 52                                          | hypothetical protein                        | 52                                             | hypothetical protein                             |
| 53                                         | hypothetical protein                   | 53                                      | protein kinase                       | 53                                          | hypothetical protein                        | 53                                             | hypothetical protein                             |
| 54                                         | thymidylate synthase                   | 54                                      | integrase                            | 54                                          | hypothetical protein                        | 54                                             | hypothetical protein                             |
| 55                                         | hypothetical protein                   | 55                                      | tRNA-Asp                             | 55                                          | hypothetical protein                        | 55                                             | helix-turn-helix DNA binding protein             |
| 56                                         | hypothetical protein                   | 56                                      | tRNA-Thr                             | 56                                          | hypothetical protein                        | 56                                             | integrase                                        |
| 57                                         | hypothetical protein                   | 57                                      | hypothetical protein                 | 57                                          | hypothetical protein                        | 57                                             | hypothetical protein                             |
| 58                                         | hypothetical protein                   | 58                                      | HNH endonuclease                     | 58                                          | hypothetical protein                        | 58                                             | ThyX-like thymidylate synthase                   |
| 59                                         | hypothetical protein                   |                                         |                                      | 59                                          | DNA primase/polymerase                      | 59                                             | hypothetical protein                             |
| 60                                         | hypothetical protein                   |                                         |                                      | 60                                          | hypothetical protein                        | 60                                             | hypothetical protein                             |
| 61                                         | deoxynucleoside monophosphate kinase   |                                         |                                      | 61                                          | hypothetical protein                        | 61                                             | hypothetical protein                             |
| 62                                         | hypothetical protein                   |                                         |                                      | 62                                          | hypothetical protein                        | 62                                             | hypothetical protein                             |
| 63                                         | hypothetical protein                   |                                         |                                      | 63                                          | hypothetical protein                        | 63                                             | hypothetical protein                             |
| 64                                         | hypothetical protein                   |                                         |                                      | 64                                          | hypothetical protein                        | 64                                             | hypothetical protein                             |
| 65                                         | hypothetical protein                   |                                         |                                      | 65                                          | hypothetical protein                        | 65                                             | deoxymononucleoside kinase                       |
| 66                                         | hypothetical protein                   |                                         |                                      | 66                                          | hypothetical protein                        | 66                                             | hypothetical protein                             |
| 67                                         | hypothetical protein                   |                                         |                                      | 67                                          | hypothetical protein                        | 67                                             | hypothetical protein                             |
| 68                                         | hypothetical protein                   |                                         |                                      | 68                                          | hypothetical protein                        | 68                                             | hypothetical protein                             |
| 69                                         | hypothetical protein                   |                                         |                                      | 69                                          | hypothetical protein                        | 69                                             | hypothetical protein                             |
| 70                                         | hypothetical protein                   |                                         |                                      | 70                                          | hypothetical protein                        | 70                                             | hypothetical protein                             |
| 71                                         | hypothetical protein                   |                                         |                                      | 71                                          | hypothetical protein                        | 71                                             | hypothetical protein                             |
| 72                                         | hypothetical protein                   |                                         |                                      | 72                                          | hypothetical protein                        | 72                                             | hypothetical protein                             |
| 73                                         | hypothetical protein                   |                                         |                                      | 73                                          | hypothetical protein                        | 73                                             | hypothetical protein                             |
| 74                                         | hypothetical protein                   |                                         |                                      | 74                                          | hypothetical protein                        | 74                                             | hypothetical protein                             |
| 75                                         | hypothetical protein                   |                                         |                                      | 75                                          | hypothetical protein                        | 75                                             | hypothetical protein                             |
| 76                                         | hypothetical protein                   |                                         |                                      | 76                                          | hypothetical protein                        | 76                                             | hypothetical protein                             |
| 77                                         | hypothetical protein                   |                                         |                                      | 77                                          | hypothetical protein                        | 77                                             | hypothetical protein                             |
| 78                                         | acetyltransferase                      |                                         |                                      | 78                                          | hypothetical protein                        | 78                                             | hypothetical protein                             |
| 79                                         | hypothetical protein                   |                                         |                                      | 79                                          | hypothetical protein                        | 79                                             | hypothetical protein                             |
| 80                                         | hypothetical protein                   |                                         |                                      | 80                                          | hypothetical protein                        | 80                                             | hypothetical protein                             |
| 81                                         | hypothetical protein                   |                                         |                                      | 81                                          | DNA helicase                                | 81                                             | hypothetical protein                             |
|                                            |                                        |                                         |                                      | 82                                          | HNH endonuclease                            | 82                                             | hypothetical protein                             |
|                                            |                                        |                                         |                                      | 83                                          | hydrolase                                   | 83                                             | hypothetical protein                             |
|                                            |                                        |                                         |                                      | 84                                          | DNA helicase                                | 84                                             | hypothetical protein                             |
|                                            |                                        |                                         |                                      | 85                                          | helix-turn-helix DNA binding domain protein | 85                                             | hypothetical protein                             |
|                                            |                                        |                                         |                                      | 86                                          | hypothetical protein                        | 86                                             | hypothetical protein                             |
|                                            |                                        |                                         |                                      |                                             |                                             | 87                                             | hypothetical protein                             |
|                                            |                                        |                                         |                                      |                                             |                                             | 88                                             | hypothetical protein                             |

311

312

### *Characterization of CRISPR Elements in the Genomes of Our Streptomyces Strains*

Prior to testing the ability of our phages to infect the *Streptomyces* isolates, we decided to examine the strains for complete and functional CRISPR/Cas systems. Our reasoning for this was two-fold. First, the presence of acquired spacers and their specific sequences would allow us to make predictions about whether or not our phages can infect our antibiotic-producing strains. And, second, it was conceivable that in doing so we might discover a novel CRISPR/Cas-based system. Our bioinformatic analysis identified the presence of Cas enzymes and CRISPR arrays within the genomes all four of our *Streptomyces* isolates, but the abundance of CRISPRs in each strain varied greatly (Table 9). QF2 contained the largest number of predicted CRISPRs – 39 in total, scattered around the chromosome, each containing between one and 25 spacers (Fig 4B, purple; Table 10). Some predicted spacers within these arrays matched with 94-100% identity to sequences within TrvxScott (7 spacers), BartholomewSD (4 spacers), Shawty (2 spacers), and IceWarrior (5 spacers) (Table 10, Table 11). Spacers targeted a variety of genes including those encoding minor tail proteins, tape measure proteins, deoxycytidylate deaminase, helix-turn-helix DNA binding proteins, endolysin, and capsid maturation protease (Fig 7). The large number of putative spacers in the QF2 genome targeting TrvxScott, BartholomewSD, Shawty, and IceWarrior suggests that strain QF2 has likely previously encountered and acquired resistance to each of these phages. Moreover, strain QF2 was isolated from the same soil sample as BartholomewSD, providing support for these findings. Strain QF2 also encoded seven proteins of a Type IE CRISPR-Cas system.<sup>64-68</sup> The QF2 proteins were distantly related to the enzymes of the canonical Cas3 system in *E. coli* (Fig 8), but the operon in strain QF2 lacked two genes (Cas1 and Cas2) involved in spacer acquisition. This phenomenon, the absence of Cas1 and Cas2, has previously been reported as a common feature of Streptomycetaceae Type IE systems.<sup>69</sup> The presence in the QF2 genome of a Cas3 system and spacers mapping to essential



proteins in each of the genomes of our phages suggests that the strain is likely resistant to all four of our phages, and thus, transduction is unlikely with strain QF2.

**Table 9. General characteristics of predicted CRISPR-Cas systems within the genomes of strains DF, SFW, QF2, and JS.**

| Strains    | CRISPR | Spacers | Repeats | Spacers with<br>Blastn Hits to Host<br>Range Phage | Cas<br>Loci | Cas-<br>Associated<br>Genes |
|------------|--------|---------|---------|----------------------------------------------------|-------------|-----------------------------|
| <b>DF</b>  | 12     | 14      | 26      | 2                                                  | 3           | 9                           |
| <b>SFW</b> | 11     | 23      | 34      | 2                                                  | 3           | 17                          |
| <b>QF2</b> | 39     | 168     | 207     | 14                                                 | 5           | 22                          |
| <b>JS</b>  | 4      | 8       | 12      | 0                                                  | 4           | 20                          |

Included in this table is the number of spacers within the genome of each bacterial strain with sequence similarity to regions within any of the four phage isolates (IceWarrior, TrvxScott, BartholomewSD, or Shawty).

**Table 10. Characteristics of the 38 CRISPRs predicted in the draft genome sequence of strain QF2.**

| Strain QF2 |         |         |              |             |             |                                             |
|------------|---------|---------|--------------|-------------|-------------|---------------------------------------------|
| CRISPRs    | Min     | Max     | Length (nt.) | No. Repeats | No. Spacers | Spacer Blastn Hit to Host Range Phage       |
| 1          | 384313  | 384428  | 116          | 2           | 1           | S1 [BartholomewSD]                          |
| 2          | 437656  | 437755  | 100          | 2           | 1           |                                             |
| 3          | 835820  | 835922  | 103          | 2           | 1           |                                             |
| 4          | 1307659 | 1307752 | 94           | 2           | 1           |                                             |
| 5          | 1344898 | 1345205 | 308          | 6           | 5           |                                             |
| 6          | 1543053 | 1543144 | 92           | 2           | 1           |                                             |
| 7          | 1616159 | 1616542 | 384          | 5           | 4           | S13 [BartholomewSD, TrvxScott]              |
| 8          | 1618208 | 1618291 | 84           | 2           | 1           |                                             |
| 9          | 1833873 | 1833977 | 105          | 2           | 1           |                                             |
| 10         | 1861097 | 1861197 | 101          | 2           | 1           |                                             |
| 11         | 2316101 | 2316187 | 87           | 2           | 1           |                                             |
| 12         | 2704894 | 2704990 | 97           | 2           | 1           |                                             |
| 13         | 3015981 | 3016376 | 396          | 7           | 6           | S21 [IceWarrior]                            |
| 14         | 3106815 | 3107262 | 448          | 8           | 7           | S27 [BartholomewSD, TrvxScott]              |
| 15         | 3112452 | 3113433 | 982          | 17          | 16          | S34 [IceWarrior], S41 [TrvxScott]           |
| 16         | 3138610 | 3140161 | 1,552        | 26          | 25          |                                             |
| 17         | 3145439 | 3145830 | 392          | 7           | 6           |                                             |
| 18         | 3444685 | 3444779 | 95           | 2           | 1           |                                             |
| 19         | 3507440 | 3507598 | 159          | 3           | 2           |                                             |
| 20         | 3791739 | 3792012 | 274          | 5           | 4           |                                             |
| 21         | 3838730 | 3838804 | 75           | 2           | 1           |                                             |
| 22         | 4257871 | 4258080 | 210          | 4           | 3           | S89 [IceWarrior]                            |
| 23         | 4327550 | 4328916 | 1,367        | 23          | 22          | S105 [IceWarrior], S106 [Shawty, TrvxScott] |
| 24         | 4333365 | 4334666 | 1,302        | 22          | 21          | S118 [TrvxScott], S131 [Shawty, TrvxScott]  |
| 25         | 4335904 | 4336481 | 578          | 10          | 9           | S138 [BartholomewSD], S140 [TrvxScott]      |
| 26         | 4522773 | 4522879 | 107          | 2           | 1           |                                             |
| 27         | 4528080 | 4528148 | 69           | 2           | 1           |                                             |
| 28         | 4657265 | 4657374 | 110          | 2           | 1           |                                             |
| 29         | 4754273 | 4754356 | 84           | 2           | 1           |                                             |
| 30         | 4787509 | 4787642 | 134          | 3           | 2           |                                             |
| 31         | 4987714 | 4987810 | 97           | 2           | 1           |                                             |
| 32         | 5305650 | 5305745 | 96           | 2           | 1           |                                             |
| 33         | 5400452 | 5400541 | 90           | 2           | 1           | S151 [IceWarrior]                           |
| 34         | 5417083 | 5417162 | 80           | 2           | 1           |                                             |
| 35         | 5441923 | 5442032 | 110          | 2           | 1           |                                             |
| 36         | 6552625 | 6552699 | 75           | 2           | 1           |                                             |
| 37         | 6798173 | 6798309 | 137          | 3           | 2           |                                             |
| 38         | 7177566 | 7177797 | 232          | 6           | 5           |                                             |

Spacers with sequence similarity to any of the four phages in this study are listed next to their corresponding CRISPR and are identified according to their position relative to all other spacers within the QF2 genome.

**Table 11. Spacers within the genomes of strain DF, SFW, and QF2 that have sequence similarity to at least one of the four phage isolates.**

| Strain DF  |        |                               |                       |                      |              |         |         |              |                                                                    |
|------------|--------|-------------------------------|-----------------------|----------------------|--------------|---------|---------|--------------|--------------------------------------------------------------------|
| CRISPR     | Spacer | Blatn Hit to Host Range Phage | Score (bits) / E Val. | No. Identities (%ID) | Strand       | Minimum | Maximum | Length (nt.) | Sequence                                                           |
| 9          | S11    | BartholomewSD                 | 30.2 (15) / 2.4       | 15/15 (100%)         | Plus / Minus | 4171019 | 4171050 | 32           | TGCCACCGGCGGAGCCGCTCCGACGGCAG                                      |
| 10         | S12    | TrvxScott                     | 30.2 (15) / 4.9       | 15/15 (100%)         | Plus / Plus  | 4684554 | 4684602 | 49           | GGTGCCCGCGCGTCCGCTGATGCTCTCGGCTGAGCGGGCTGCCG                       |
|            |        | BartholomewSD                 | 28.2 (14) / 9.5       | 14/14 (100%)         | Plus / Minus |         |         |              |                                                                    |
| Strain SFW |        |                               |                       |                      |              |         |         |              |                                                                    |
| CRISPR     | Spacer | Blatn Hit to Host Range Phage | Score (bits) / E Val. | No. Identities (%ID) | Strand       | Minimum | Maximum | Length (nt.) | Sequence                                                           |
| 1          | S1     | Shawty                        | 28.2 (14) / 5.9       | 14/14 (100%)         | Plus / Plus  | 250625  | 250650  | 26           | GAGTCACGACCGGGCGAAGGCACGC                                          |
| 5          | S6     | IceWarrior                    | 32.2 (16) / 0.99      | 19/20 (95%)          | Plus / Plus  | 4553831 | 4553872 | 42           | CGGGCGTCGACGGTGACGAGCGTCGCGTCTCTCTCTTG                             |
| Strain QF2 |        |                               |                       |                      |              |         |         |              |                                                                    |
| CRISPR     | Spacer | Blatn Hit to Host Range Phage | Score (bits) / E Val. | No. Identities (%ID) | Strand       | Minimum | Maximum | Length (nt.) | Sequence                                                           |
| 1          | S1     | BartholomewSD                 | 32.2 (16) / 1.2       | 16/16 (100%)         | Plus / Plus  | 384347  | 384394  | 48           | GCGGACGGCGCGCGCGGCTACCCCGGTGTCCACGACGGCGCGCG                       |
| 7          | S13    | BartholomewSD                 | 32.2 (16) / 1.9       | 16/16 (100%)         | Plus / Plus  | 1616356 | 1616423 | 68           | CGACCTGCGGTACCACTCGATCCGGCGCGGTCCCATCTACAAGGGCACGGTGTCCAGCGGACCGAG |
| 13         | S21    | TrvxScott                     | 30.2 (15) / 1.9       | 16/16 (100%)         | Plus / Plus  |         |         |              |                                                                    |
|            |        | IceWarrior                    | 30.2 (15) / 2.5       | 15/15 (100%)         | Plus / Minus | 3016077 | 3016109 | 33           | CGCCGGAACCTCAAGGAGGAGACGCGCGGG                                     |
| 14         | S27    | BartholomewSD                 | 30.2 (15) / 3.1       | 18/19 (94%)          | Plus / Minus | 3106902 | 3106938 | 37           | AGGGCTGGCCGTGCGGGGTGCGGGTGGAGCTGTGGT                               |
|            |        | TrvxScott                     | 30.2 (15) / 3.1       | 18/19 (94%)          | Plus / Minus |         |         |              |                                                                    |
| 15         | S34    | IceWarrior                    | 30.2 (15) / 2.4       | 15/15 (100%)         | Plus / Plus  | 3112541 | 3112572 | 32           | ACAGCGACGTCGCCCTACAACCTACGCCGCTGG                                  |
|            |        | TrvxScott                     | 28.2 (14) / 9.5       | 14/14 (100%)         | Plus / Plus  | 3112961 | 3112992 | 32           | GGTGTGAACCGCTCGCGCGGCGTGAACCTTGT                                   |
| 22         | S89    | IceWarrior                    | 30.2 (15) / 2.5       | 15/15 (100%)         | Plus / Plus  | 4257958 | 4257990 | 33           | CGCGGGCGTCCCTTCGCCGAGGAGACCTGCCC                                   |
|            |        | IceWarrior                    | 30.2 (15) / 2.5       | 15/15 (100%)         | Plus / Minus | 4328429 | 4328461 | 33           | CATCAGCGTCTGAAGCAGCAGCGCCATCGCCTT                                  |
| 23         | S106   | Shawty                        | 28.2 (14) / 9.5       | 14/14 (100%)         | Plus / Plus  | 4328491 | 4328522 | 32           | TGATCGAGCGCGGACGGGCACATCAGCGGCC                                    |
|            |        | TrvxScott                     | 28.2 (14) / 9.5       | 14/14 (100%)         | Plus / Minus |         |         |              |                                                                    |
|            |        | S118                          | 28.2 (14) / 9.5       | 14/14 (100%)         | Plus / Plus  | 4333692 | 4333723 | 32           | GCCGCGTCCGGCTACGGCTACGGCTCCGCCCC                                   |
|            |        | S131                          | 28.2 (14) / 9.5       | 14/14 (100%)         | Plus / Minus | 4334483 | 4334514 | 32           | AACGCGCTCATGAGGCGCTGCGTTTGGCGTC                                    |
|            |        | S138                          | 28.2 (14) / 9.5       | 14/14 (100%)         | Plus / Plus  | 4336177 | 4336208 | 32           | AACGCGGACGATGCGCCGTACGAGCGCGG                                      |
|            |        | S140                          | 28.2 (14) / 9.5       | 14/14 (100%)         | Plus / Minus | 4336299 | 4336330 | 32           | ATCTCGCGTCCAGACCGCTCGACGCAAT                                       |
| 33         | S151   | IceWarrior                    | 36.2 (18) / 0.063     | 18/18 (100%)         | Plus / Minus | 5400476 | 5400517 | 42           | GTGGTGGCTCGCCGACGAGTGTCTCGGACGCTGGGCGGC                            |

The bold portion of each spacer shares high sequence similarity with a region in the genome of the listed host range phage. In cases where a single spacer mapped to two phages, bold and underlined are used to sequences distinguish the two.

**Fig 7. Genomic maps of phages showing regions containing sequence similarity to spacers found within the CRISPRs of strains QF2, DF, and SFW. (a) TrvxScott, (b) BartholomewSD, (c) Shawty, and (d) IceWarrior. Key displays putative functions of CRISPR targeted genes.**

**Fig 8. Class I, Type I-E CRISPR-Cas system encoded in the WGS of strain QF2. (top)** The Type I-E CRISPR-Cas operon encoded by strain QG is located from 4,973,482 to 4,987,810 and includes seven genes. The Type I-E cascade is followed by CRISPR 31, consisting of two repeats and a single spacer. **(bottom)** The canonical Type I-E CRISPR-Cas system encoded in the genome of *E. coli* K-12 MG1655 is located from 2,887,219 to 2,877,618 and includes eight genes. The Type I-E cascade is followed by a CRISPR 31, consisting of five repeats and four spacers.

Specific spacers mapping to some of our phages were also discovered within the genomes of strains DF and SFW (but not JS). Strain DF contained two spacers that mapped to sequences within the genome of BartholomewSD, and one of these spacers also shared sequence similarity with a region in TrvxScott (Table 11, Table 12). Strain SFW contained two spacers – one that shared sequence similarity with Shawty and another that mapped to a sequence in IceWarrior (Table 11, Table 13). Both strains DF and SFW encoded proteins containing regions with

similarity to the RuvC and HNH endonuclease domains of known Cas enzymes. However, given the limited similarity of these putative proteins to known Cas proteins, further study is necessary to determine if they constitute novel Cas systems. If these systems are functional, we predict that strain DF is resistant to infection by TrvxScott and BartholomewSD, and strain SFW, resistant to Shawty and IceWarrior.

**Table 12. Characteristics of the 12 CRISPRs predicted in the complete genome sequence of strain DF.**

| Strain DF |         |         |              |             |             |                                       |
|-----------|---------|---------|--------------|-------------|-------------|---------------------------------------|
| CRISPRs   | Min     | Max     | Length (nt.) | No. Repeats | No. Spacers | Spacer Blastn Hit to Host Range Phage |
| 1         | 1491701 | 1491797 | 97           | 2           | 1           |                                       |
| 2         | 1517080 | 1517203 | 124          | 2           | 1           |                                       |
| 3         | 1669449 | 1669522 | 74           | 2           | 1           |                                       |
| 4         | 1995371 | 1995463 | 93           | 2           | 1           |                                       |
| 5         | 2013671 | 2013864 | 194          | 3           | 2           |                                       |
| 6         | 2241854 | 2241958 | 105          | 2           | 1           |                                       |
| 7         | 2443114 | 2443225 | 112          | 2           | 1           |                                       |
| 8         | 3767692 | 3767796 | 105          | 2           | 1           |                                       |
| 9         | 4170935 | 4171076 | 142          | 3           | 2           | S11 [BartholomewSD]                   |
| 10        | 4684531 | 4684625 | 95           | 2           | 1           | S12 [BartholomewSD, TrvxScott]        |
| 11        | 4802187 | 4802274 | 88           | 2           | 1           |                                       |
| 12        | 5682554 | 5682639 | 86           | 2           | 1           |                                       |

Spacers with sequence similarity to any of the four phages in this study are listed next to their corresponding CRISPR and are identified according to their position relative to all other spacers within the DF genome.

**Table 13. Characteristics of the 11 CRISPRs predicted in the draft genome sequence of strain SFW.**

| Strain SFW |         |         |              |             |             |                                       |
|------------|---------|---------|--------------|-------------|-------------|---------------------------------------|
| CRISPRs    | Min     | Max     | Length (nt.) | No. Repeats | No. Spacers | Spacer Blastn Hit to Host Range Phage |
| 1          | 250601  | 250674  | 74           | 2           | 1           | S1 [Shawty]                           |
| 2          | 452415  | 452685  | 271          | 3           | 2           |                                       |
| 3          | 2779718 | 2779796 | 79           | 2           | 1           |                                       |
| 4          | 2824197 | 2824275 | 79           | 2           | 1           |                                       |
| 5          | 4553801 | 4554168 | 368          | 5           | 4           | S6 [IceWarrior]                       |
| 6          | 4731148 | 4731651 | 504          | 10          | 9           |                                       |
| 7          | 5166339 | 5166424 | 86           | 2           | 1           |                                       |
| 8          | 5317268 | 5317371 | 104          | 2           | 1           |                                       |
| 9          | 5722922 | 5723016 | 95           | 2           | 1           |                                       |
| 10         | 6532966 | 6533033 | 68           | 2           | 1           |                                       |
| 11         | 7183989 | 7184080 | 92           | 2           | 1           |                                       |

Spacers with sequence similarity to any of the four phages in this study are listed next to their corresponding CRISPR and are identified according to their position relative to all other spacers within the SFW genome.

398

399 A curious feature emerged from our analysis of the CRISPRs within the *Streptomyces* strains.  
 400 Among the 213 predicted spacers encoded by all four bacterial strains, 18 contained sequence  
 401 similarity (95-100% identity) with at least one of the four phages (Table 9). The lengths of the  
 402 matching sequences (100% identity) within bacterial spacers ranged from 14 to 18 nucleotides  
 403 and accounted for approximately half the length of a typical spacer. Additionally, a single spacer  
 404 occasionally appeared capable of targeting two distantly related phages. These spacers  
 405 contained sequences mapping to two distinct genes encoded by different viral genomes. For  
 406 example, spacer 106 in CRISPR 23 of strain QF2 is 32 nucleotides in length, and it contains 14  
 407 bases that share 100% identity with a region in the TrvxScott tape measure gene. These 14  
 408 bases overlap (by 8 nucleotides) with another sequence that is 14 base pairs in length and shares  
 409 100% identity with a region within the Shawty genome (Table 11). If these spacers functionally  
 410 serve to resist infection, our analysis suggests that a single spacer may evolve to efficiently target  
 411 more than one phage, thus providing broad immunity.

412

### 413 *Susceptibility of Streptomyces strains to infection by S. platensis phages*

414 With the hope of identifying phages that might serve as tools for transduction, we assessed the  
 415 susceptibility of our *Streptomyces* isolates to infection by each of the four *S. platensis*  
 416 phages. As predicted, strain QF2, with its Type IE Cas system and many CRISPRs containing  
 417 spacers against our phages, could not be infected by any of our four phages. Strain DF  
 418 experienced inefficient infection by TrvxScott (~2.0 x 10<sup>4</sup>-fold reduced plating efficiency  
 419 compared to *S. platensis*) and was completely resistant to infection by BartholomewSD. In  
 420 addition to these results, which were generally predicted by our CRISPR/Cas findings, we also  
 421 demonstrated strain DF's resistance to infection by Shawty and susceptibility to IceWarrior (~20-  
 422 fold reduced efficiency). Strain SFW was at least partially resistant to infection by all four phages:

Shawty (no infection), BartholomewSD (no infection), IceWarrior ( $\sim 10^7$ -fold reduced efficiency), and TrvxScott ( $\sim 1.3 \times 10^5$ -fold reduced efficiency). Finally, strain JS, despite having no spacers specifically targeting our phages, was similarly immune to infection by Shawty and BartholomewSD and partially resistant to infection by IceWarrior and TrvxScott ( $\sim 10^6$ -fold and  $\sim 10^5$ -fold reduced efficiency, respectively). These data are consistent with our predictions regarding the resistance of our *Streptomyces* isolates to infection by the phages against which they carry spacers, though it is the case that the presence of a spacer did not always confer complete immunity to the phage it targeted. In some cases, strains containing spacers could be infected relatively inefficiently by the targeted phage. For example, strain DF encoded a single spacer targeting TrvxScott but remained partially susceptible to infection. Strains DF, SFW, and JS were all capable of being infected by TrvxScott and IceWarrior to some degree. Thus, it remains possible that these two phages could be used for transducing BGCs into *S. platensis*.

### *Identification of phage integrases*

In analyzing the proteins encoded within the genomes of our phages, we identified site-specific serine recombinases encoded by BartholomewSD, TrvxScott, and Shawty. The integrases of BartholomewSD and TrvxScott were nearly identical and shared similarity to integrases belonging to a number of previously studied phages. The Shawty integrase shared protein sequence similarity with the integrases of *Streptomyces* phages TG1 and phiC31 (71.3% and 51.9% respectively). The TG1 and phiC31 integrases are distinct recombinases that share 49.7% protein sequence identity and have been used extensively as tools for integrating genes of interest into specific loci within the genomes of a wide variety of organisms, ranging from soil microbes such as *Streptomyces* to multicellular animals such as *Drosophila*.<sup>21-25</sup> Thus, as a newly discovered member of this serine integrase family, the Shawty integrase could also

potentially be used to move *Streptomyces*-encoded BGCs between strains in order to facilitate augmented expression of bioactive natural products.

This work demonstrates a method for effectively studying newly isolated, antibiotic-producing bacteria and phages that may infect them. In particular, we have highlighted how BCP can be used to assess the novelty of BGCs encoded within *Streptomyces* strains, providing a solution to the problem of dereplication. Moreover, our work illustrates how the isolation and genomic analysis of phages that infect antibiotic-producing *Streptomyces* strains might yield new genetic tools such as transducing phages or integrases, which can be used to augment the expression of novel antibiotics. Ultimately, our identification of potentially novel BGCs and phage integrases serves as a foundation for further studies that could lead to the discovery of new antibiotics.

## Materials and Methods

### *Soil sample collection and site description*

Undergraduate students enrolled in the Phage Hunters Advancing Genomics and Evolutionary Science (PHAGE) class at UCSD collected soil samples for isolating bacteria and their associated phages. Soil samples (approx. 30 ml) were collected around San Diego County (32.7157° N, 117.1611° W), California, USA.

### *Isolation of *Streptomyces**

Actinomycete isolation agar (AIA) plates (for one liter: sodium caseinate 2 g, L-Asparagine 0.1 g, sodium propionate 4 g, dipotassium phosphate 0.5 g, magnesium sulphate 0.1 g, glycerol 5 mL, rifampicin 50 µg mL<sup>-1</sup>, nystatin 100 µg mL<sup>-1</sup>, cycloheximide 100 µg mL<sup>-1</sup>, agarose 15 g, pH 8.1) were used to select for Actinobacteria from soil samples. One gram of soil was added to the agar surface and streaked across the AIA plate and incubated for two days at 30°C. The plates

were investigated for individual colonies with morphologies indicative of *Streptomyces* (vegetative hyphae, aerial mycelium), and those colonies were picked and purified at least four times on AIA-CHX plates.

#### *Phage isolation and purification*

Bacteriophages were isolated from soil samples with host, *Streptomyces platensis* JCM 4664 substr. MJ1A1. An enrichment culture was prepared from 1 g soil and 2.5 ml of *S. platensis* added to 15 ml of Luria-Bertani (LB) medium (for one liter: tryptone 10 g, yeast extract 5 g, NaCl 10 g, agar 15 g, pH 7.0), followed by a 2-day incubation at 30°C with shaking. Phage were isolated from a 1.2 ml volume of enrichment culture that was centrifuged at maximum speed for 3 min, 1 ml of the resulting supernatant was filtered (0.22 µm filter), and 5 µl of the filtrate was spotted and then streaked onto an LB plate containing 100 µg/ml of cycloheximide. *S. platensis* (0.1 ml) was mixed with 4.5 ml of LB top agar 0.7%, poured over the streak plate and incubated for two days at 30°C. Resultant plaques were re-streaked onto new LB plates containing 100 µg/ml of cycloheximide about 3-4 times for phage purification.

#### *Bacterial genomic DNA extraction and quantification for 16S rRNA PCR amplification and sequencing*

An adaptation of the DNeasy® Blood & Tissue Kit (Qiagen) protocol was used for bacterial genomic DNA extraction. Strains were cultured overnight at 30°C in 5 ml of LB broth while rolling. Cells were pelleted (16,000 x g, 3 min) from 1 ml of culture, re-suspended in 180 µl of lysis buffer (prepared in house), and incubated at 37°C for 45 min after which 25 µl of proteinase K (20 mg/mL) and 200 µl Buffer AL (Qiagen) was added. The samples were vortexed at maximum speed for 20 sec, incubated at 56°C for 30 min, and 200 µl of ethanol (96-100%) was added. The samples were vortexed at maximum speed for 30 sec, added to a DNeasy Mini spin column,



centrifuged (16,000 x g, 1 min), and the supernatant was discarded. Buffer AW2 (Qigen) was added (500 µl), followed by centrifugation (20,000 x g, 3 min). The DNeasy Mini spin column was placed into a sterile 2 ml microcentrifuge tube, and the gDNA was eluted in 100 µl of AE Buffer by centrifugation (20,000 x g, 1 min) following a 1 min incubation at room temperature. The gDNA concentration was quantified (1 µl sample volume) with a Thermo Scientific™ NanoDrop™ One Microvolume UV-Vis Spectrophotometer (840274100) and stored at -20°C.

#### *Bacterial Genomic DNA extraction for PacBio whole-genome sequencing*

High molecular weight genomic DNA (20-160 kb) was extracted from four *Streptomyces* strains (DF, SFW, QF2, and JS) with the QIAGEN-Genomic-tip 500/G kit (10262) according to the manufacturer's protocol for bacteria.

#### *Bacterial whole-genome sequencing, assembly, and annotation*

The genome sequences of four *Streptomyces* strains were generated using the Pacific Biosciences RS II (PacBio RS II) single molecule real-time (SMRT) sequencing platform at the IGM Genomics Center, University of California, San Diego, La Jolla, CA. Genome sequences were assembled using the HGAP protocol integrated in the PacBio RS II sequencer (smrt analysis v2.3.0/Patch5) resulting in a variable number (n = 1-95) of contigs per genome, and ranged in size from 5.42 to 7.79 Mb. The mauve contig mover was used to order the contigs of three draft genome sequences (genomes of strains SFW, QF2, and JS) relative to a closely related reference sequence (*S. pratensis* ATCC 33331, *S. globisporus* C-1027, and *S. parvulus* 2297 respectively). DNA sequencing of strain DF resulted in a single contig and did not require reordering to restore gene synteny. Gene prediction and annotation were made with the Rapid Annotations using Subsystems Technology (RASTtk) platform.<sup>70</sup>

## *Phage genomic DNA extraction*

5 µl of RNase A and 5 µl of DNase I were added to 10ml of lysate, incubated at 30°C for 30 minutes, and then precipitated overnight at 4°C by the addition of 4 ml of 20% polyethylene glycol 8,000. Samples were centrifuged at 10,000 g's for 30 minutes, and pellets resuspended in Qiagen PB buffer and DNA isolated using a Qiagen plasmid DNA isolation column as recommended by the manufacturer.

## *Phage genome sequencing, assembly, and annotation*

Genomic DNA of 4 bacteriophages (TrvxScott, BartholomewSD, Shawty, and IceWarrior) was sequenced using the Illumina MiSeq platform at the Pittsburgh Bacteriophage Institute sequencing facility. The genomes were assembled with Newbler and checked for quality with Consed. The whole genome sequences were submitted to GenBank (Acc No. MH669016, MK460245, MK433266, and MK433259). DNA Master was used for annotation, and NCBI BLASTp was used to determine the potential function of gene products. Whole genome sequence comparisons were performed in Phamerator.<sup>71</sup>

## *16S rRNA PCR amplification and sequencing*

16S ribosomal DNA templates (~1,465 bp) were amplified using Q5 high fidelity PCR (New England Biolabs) with the universal primer set 27F (5'-AGAGTTTGATCCTGGCTCAG-3') and 1492R (5'-GGTACCTTGTTACGACTT-3').<sup>72</sup> Each PCR mixture (50 µl) contained 100 ng of template gDNA, 500 pmol of each primer, and 200 µM dNTPs. PCR thermocycling conditions were as follows: 30 seconds of initial denaturation at 98°C, 30 cycles of denaturation at 98°C for 10 seconds, annealing for 15 seconds at 60°C, extension at 72°C for 1.5 minutes, and a final extension at 72°C for 5 minutes then held at 4°C. PCR products were purified with the oligonucleotide cleanup protocol as described in the Monarch PCR & DNA Cleanup Kit 5 µg user

manual (NEB #T1030). Clean PCR products were sequenced using Sanger methods by Eton Biosciences (<https://www.etonbio.com/>) and trimmed for quality before analysis.

# *CRISPR-Cas sequence analysis and predictions*

The sequences of all four *Streptomyces* were searched for CRISPR arrays (repeats and spacers) and potentially associated Cas genes using the following software tools; CRISPR-Cas++,<sup>64, 65</sup> CRISPROne,<sup>66</sup> CRISPRMiner2,<sup>67</sup> and CRISPRDetect.<sup>68</sup>

# *Phylogenetic analyses of bacterial isolates*

16S rRNA sequences were trimmed on both ends, (5' and 3') in Geneious Prime using the Trim Ends function with an error probability limit set at 0.05, which trims regions with more than a 5% chance of an error per base. Sequences were aligned using MUSCLE v3.8.425 with a maximum of 1,000 iterations, and profile-dependent parameters were set. Sequences were grouped based on similarity, and anchor optimized. Distance was measured using kmer4\_6 for the first iteration, and subsequent distance measurements were performed with pctid\_kimura. For all iterations the clustering method was neighbor joining, and the sequence weighting scheme was ClustalW with an spm objective score, 32 anchor spacing and -1 gap open score. Diagonals were set at a minimum length of 24 and a margin of 5, the minimum column anchor scores were set min best and min smoothed at 90. Finally, the hydrophobicity multiplier was set at 1.2 with a window size of 5. The tree was created with the Geneious Tree Builder using the Jukes-Cantor genetic distance model, Neighbor-Joining method to build the tree, with the outgroup set as *Chlorobium limicola* strain DSM 245. The resulting consensus tree was obtained after 1,000 iterations of bootstrap resampling, with a support threshold set at 70% and a random seed of 409,923.

## Cross-streak method for assessing antibacterial production potential

From a single colony, using sterile Q-tips, *Streptomyces* isolates were streaked in a broad vertical line (2 inch) onto LB, and AIA, solid agar plates and incubated for one week at 30°C. The day before the assay, test strains (*E. coli* JP313  $\Delta tolC$ , *B. subtilis* PY79, and *E. coli* MC4100) were grown in 5 ml of LB and incubated at 30°C overnight while rolling. On the day of the antibacterial screen, the overnight cultures of each test strain were diluted (1:100 in 5 ml LB) and grown to log phase OD<sub>600</sub> 0.15-0.2 (~1.5 hr at 30°C while rolling). A volume of 10 µl of each test strain was spotted in distinct lines almost to the edge of the *Streptomyces* line at a perpendicular angle. The plates were incubated overnight at 30°C, then investigated for the presence of zones of inhibition which were measured in millimeters.

## Bacterial cytological profiling (BCP) on plates

Fluorescence microscopy and BCP on plates was performed as previously described by Nonejuie et. al.<sup>15</sup> Briefly, *Streptomyces* strains (DF, SFW, QF2, and JS) were streaked in a vertical line down the center of LB, AIA, and ISP2 plates (for one liter: 4.0 g Difco yeast extract, 10.0 g Difco malt extract, 4.0 g dextrose, 20.0 g agar, pH 7.0), incubated for one week at 30°C. The test strain, *E. coli* JP313  $\Delta tolC$ , was prepared and spotted as described above in the cross-streak method. Following a 2 hr incubation at 30°C, a 1.5 x 1.5 cm square (~2.5 cm<sup>2</sup>) piece of agar containing the *E. coli* test strain was cut and prepared for high resolution fluorescence microscopy. The cut piece of agar was placed on a microscope slide, the *E. coli* cells were stained with fluorescent dyes, a coverslip was placed on top of the stained cells then imaged.

## Host range experiment

The host ranges of 4 phages were determined against the *Streptomyces* strains: QF2, DF, JS, and SFW. The experiment was blinded by assigning phages numbers i-iv and hosts letters A-D.

A lawn of *Streptomyces* in LB top agar was poured on LB CHX plates. After the top agar solidified, a grid was drawn on the bottom of the plate, and 5  $\mu$ l of pre-diluted phage samples ( $10^0$  to  $10^{-10}$  in phage buffer) were spotted in squares on the grid. Plaques were counted and used to calculate a titer, which was then compared to the titer obtained against *S. platensis* in order to calculate the efficiency of infection.

### *Transmission electron microscopy*

10  $\mu$ l of lysate was applied to a copper grid, stained with 1% uranyl acetate, washed twice with phage buffer, and allowed to dry. Images were collected using a FEI Tecnai Spirit G2 BioTWIN Transmission Electron Microscope equipped with a bottom mount Eagle 4k camera.

### *Strains used in this study*

We used the following strains: *S. platensis* JCM 4664 substr. MJ1A1, *E. coli* MC4100, *B. subtilis* PY79, *P. aeruginosa* P4, *S. aureus* MRSA USA300 TCH1516 from Texas Children's Hospital (USA300-HOU-MR), *S. coelicolor* A3(2) substr. M146, *E. coli* JP313  $\Delta tolC$ , as well as two strains generously donated by Prof. Keith Poole at Queens University in Kingston, Canada – *P. aeruginosa* PA01 and *P. aeruginosa* K2733  $\Delta$ efflux ( $\Delta MexAB-OprM$ ,  $\Delta MexCD-OprJ$ ,  $\Delta MexEF-OprN$ ,  $\Delta MexXY-OprM$ ). The  $\Delta tolC5$  mutation is derived from strain EW1b (CGSC #5634), and was introduced into strain JP313 by P1 transduction. JP313 was transduced to tetracycline resistance with a lysate of strain CAG18475 (*metC162::Tn10*), and the methionine requirement of the transductants was confirmed. This strain was then transduced to prototrophy with a lysate of EW1b, and these transductants were screened on MacConkey agar for the presence of the  $\Delta tolC5$  mutation. EW1b and CAG18475 were obtained from the *Coli* Genetic Stock Center at Yale University.

## Data Availability

All data generated or analyzed in this study are included in this article and its supplementary information files. Nucleotide sequences of the phages in this study have been deposited in the GenBank database with accession numbers: MK460245 (BartholomewSD), MH669016 (TrvxScott), MK433266 (Shawty), and MK433259 (IceWarrior).

## Competing Interests

The authors declare no competing interests.

## References

1. Wenciewicz, T.A., *Crossroads of Antibiotic Resistance and Biosynthesis*. J Mol Biol, 2019. **431**(18): p. 3370-3399.
2. Pogue, J., et al., *Appropriate antimicrobial therapy in the era of multidrug-resistant human pathogens*. Clinical Microbiology and Infection, 2015. **21**(4): p. 302-312.
3. Brown, E.D. and G.D. Wright, *Antibacterial drug discovery in the resistance era*. Nature, 2016. **529**(7586): p. 336-343.
4. Newman, D.J. and G.M. Cragg, *Natural products as sources of new drugs from 1981 to 2014*. Journal of natural products, 2016. **79**(3): p. 629-661.
5. Fischbach, M.A. and C.T. Walsh, *Antibiotics for emerging pathogens*. Science, 2009. **325**(5944): p. 1089-1093.
6. Hover, B.M., et al., *Culture-independent discovery of the malacidins as calcium-dependent antibiotics with activity against multidrug-resistant Gram-positive pathogens*. Nature microbiology, 2018. **3**(4): p. 415-422.
7. Ling, L.L., et al., *A new antibiotic kills pathogens without detectable resistance*. Nature, 2015. **517**(7535): p. 455-459.
8. Chen, R., H.L. Wong, and B.P. Burns, *New approaches to detect biosynthetic gene clusters in the environment*. Medicines, 2019. **6**(1): p. 32.
9. Pye, C.R., et al., *Retrospective analysis of natural products provides insights for future discovery trends*. Proceedings of the National Academy of Sciences, 2017. **114**(22): p. 5601-5606.
10. Cox, G., et al., *A Common Platform for Antibiotic Dereplication and Adjuvant Discovery*. Cell Chem Biol, 2017. **24**(1): p. 98-109.
11. Nonejuie, P., et al., *Bacterial cytological profiling rapidly identifies the cellular pathways targeted by antibacterial molecules*. Proceedings of the National Academy of Sciences, 2013. **110**(40): p. 16169-16174.



12. Lamsa, A., et al., *Rapid inhibition profiling in Bacillus subtilis to identify the mechanism of action of new antimicrobials*. ACS chemical biology, 2016. **11**(8): p. 2222-2231.
13. Lamsa, A., et al., *The Bacillus subtilis cannibalism toxin SDP collapses the proton motive force and induces autolysis*. Molecular microbiology, 2012. **84**(3): p. 486-500.
14. Peters, C.E., et al., *Rapid Inhibition Profiling Identifies a Keystone Target in the Nucleotide Biosynthesis Pathway*. ACS chemical biology, 2018. **13**(12): p. 3251-3258.
15. Nonejuie, P., et al., *Application of bacterial cytological profiling to crude natural product extracts reveals the antibacterial arsenal of Bacillus subtilis*. The Journal of antibiotics, 2016. **69**(5): p. 353.
16. Quach, D., et al., *Bacterial cytological profiling (BCP) as a rapid and accurate antimicrobial susceptibility testing method for Staphylococcus aureus*. EBioMedicine, 2016. **4**: p. 95-103.
17. Alberti, F. and C. Corre, *Editing streptomycete genomes in the CRISPR/Cas9 age*. Natural product reports, 2019. **36**(9): p. 1237-1248.
18. de Jonge, P.A., et al., *Molecular and evolutionary determinants of bacteriophage host range*. Trends in microbiology, 2019. **27**(1): p. 51-63.
19. Russell, D.A. and G.F. Hatfull, *PhagesDB: the actinobacteriophage database*. Bioinformatics, 2017. **33**(5): p. 784-786.
20. Genilloud, O., *Actinomycetes: still a source of novel antibiotics*. Natural product reports, 2017. **34**(10): p. 1203-1232.
21. Thorpe, H.M., S.E. Wilson, and M.C. Smith, *Control of directionality in the site-specific recombination system of the Streptomyces phage  $\phi$ C31*. Molecular microbiology, 2000. **38**(2): p. 232-241.
22. Fogg, P.C.M., et al., *New Applications for Phage Integrases*. Journal of Molecular Biology, 2014. **426**(15): p. 2703-2716.
23. Morita, K., et al., *The site-specific recombination system of actinophage TG1*. FEMS Microbiol Lett, 2009. **297**(2): p. 234-40.
24. Morita, K., et al., *Site-specific genome integration in alphaproteobacteria mediated by TG1 integrase*. Applied Microbiology and Biotechnology, 2012. **93**(1): p. 295-304.
25. Venken, K.J.T., et al., *Genome engineering: Drosophila melanogaster and beyond*. Wiley interdisciplinary reviews. Developmental biology, 2016. **5**(2): p. 233-267.
26. Thakur, D., et al., *Influence of nutrition and culturing conditions for optimum growth and antimicrobial metabolite production by Streptomyces sp. 201*. Journal de Mycologie Medicale, 2009. **19**(3): p. 161-167.
27. Zimmerman, S.B., *Toroidal nucleoids in Escherichia coli exposed to chloramphenicol*. Journal of structural biology, 2002. **138**(3): p. 199-206.
28. Aziz, R.K., et al., *The RAST Server: rapid annotations using subsystems technology*. BMC genomics, 2008. **9**(1): p. 75.
29. Blin, K., et al., *antiSMASH 5.0: updates to the secondary metabolite genome mining pipeline*. Nucleic acids research, 2019. **47**(W1): p. W81-W87.
30. Kautsar, S.A., et al., *MIBiG 2.0: a repository for biosynthetic gene clusters of known function*. Nucleic acids research, 2020. **48**(D1): p. D454-D458.
31. Holm, M., et al., *Molecular mechanism of viomycin inhibition of peptide elongation in bacteria*. Proceedings of the National Academy of Sciences, 2016. **113**(4): p. 978-983.
32. Komatsu, Y. and K. Tanaka, *Mechanism of Action of Showdomycin: Part II. Effect of Showdomycin on the Synthesis of Deoxyribonucleic Acid in Escherichia coli*. Agricultural and Biological Chemistry, 1970. **34**(6): p. 891-899.
33. Reusser, F., *Ficellomycin and feldamycin; inhibitors of bacterial semiconservative DNA replication*. Biochemistry, 1977. **16**(15): p. 3406-3412.

34. Pohle, S., et al., *Biosynthetic gene cluster of the non-ribosomally synthesized cyclodepsipeptide skyllamycin: deciphering unprecedented ways of unusual hydroxylation reactions*. Journal of the American Chemical Society, 2011. **133**(16): p. 6194-6205.
35. Kanda, N., et al., *DB-2073, a new alkylresorcinol antibiotic*. The Journal of antibiotics, 1975. **28**(12): p. 935-942.
36. GÜRTLER, H., et al., *Albaflavenone, a sesquiterpene ketone with a zizaene skeleton produced by a streptomycete with a new rope morphology*. The Journal of antibiotics, 1994. **47**(4): p. 434-439.
37. Zhao, B., et al., *Biosynthesis of the sesquiterpene antibiotic albaflavenone in Streptomyces coelicolor A3 (2)*. Journal of Biological Chemistry, 2008. **283**(13): p. 8183-8189.
38. Hobbs, G., et al., *An integrated approach to studying regulation of production of the antibiotic methylenomycin by Streptomyces coelicolor A3 (2)*. Journal of bacteriology, 1992. **174**(5): p. 1487-1494.
39. Baltz, R.H., V. Miao, and S.K. Wrigley, *Natural products to drugs: daptomycin and related lipopeptide antibiotics*. Natural Product Reports, 2005. **22**(6): p. 717-741.
40. Drautz, H., W. Keller-Schierlein, and H. Zähner, *Stoffwechselprodukte von Mikroorganismen*. Archives of Microbiology, 1975. **106**(3): p. 175-190.
41. Ballard, T.E. and C. Melander, *Kinamycin-mediated DNA cleavage under biomimetic conditions*. Tetrahedron Letters, 2008. **49**(19): p. 3157-3161.
42. Nagarajan, R., et al.,  *$\beta$ -Lactam Antibiotics from Streptomyces*. Journal of the American Chemical Society, 1971. **93**(9): p. 2308-2310.
43. Papp-Wallace, K.M., et al., *Carbapenems: past, present, and future*. Antimicrobial agents and chemotherapy, 2011. **55**(11): p. 4943-4960.
44. Neu, H.C. and K.P. Fu, *Clavulanic acid, a novel inhibitor of  $\beta$ -lactamases*. Antimicrobial agents and chemotherapy, 1978. **14**(5): p. 650-655.
45. Suzuki, J., T. KUNIMOTO, and M. HORI, *Effects of kanamycin on protein synthesis: inhibition of elongation of peptide chains*. The Journal of antibiotics, 1970. **23**(2): p. 99-101.
46. Zhang, X., et al., *Biosynthetic Investigations of Lactonamycin and Lactonamycin Z: Cloning of the Biosynthetic Gene Clusters and Discovery of an Unusual Starter Unit*. Antimicrobial Agents and Chemotherapy, 2008. **52**(2): p. 574.
47. Matsumoto, N., et al., *Lactonamycin, a new antimicrobial antibiotic produced by Streptomyces rishiriensis MJ773-88K4*. The Journal of antibiotics, 1999. **52**(3): p. 269-275.
48. Yamamoto, H., et al., *Ribosomal resistance of an istamycin producer, Streptomyces tenjimariensis, to aminoglycoside antibiotics*. Biochemical and biophysical research communications, 1981. **100**(3): p. 1396-1401.
49. Hoang, N.H., et al., *Istamycin aminoglycosides profiling and their characterization in Streptomyces tenjimariensis ATCC 31603 culture using high-performance liquid chromatography with tandem mass spectrometry*. Journal of separation science, 2016. **39**(24): p. 4712-4722.
50. Okami, Y., et al., *New aminoglycoside antibiotics, istamycins A and B*. The Journal of antibiotics, 1979. **32**(9): p. 964-966.
51. Hertweck, C., et al., *Type II polyketide synthases: gaining a deeper insight into enzymatic teamwork*. Natural product reports, 2007. **24**(1): p. 162-190.
52. Newbold, C.J., et al., *Effect of the novel ionophore tetrinasin (ICI 139603) on ruminal microorganisms*. Appl. Environ. Microbiol., 1988. **54**(2): p. 544-547.



53. Kusche, B.R., et al., *Alternating pattern of stereochemistry in the nonactin macrocycle is required for antibacterial activity and efficient ion binding*. Journal of the American Chemical Society, 2009. **131**(47): p. 17155-17165.
54. Cruz-Morales, P., et al., *Phylogenomic analysis of natural products biosynthetic gene clusters allows discovery of arseno-organic metabolites in model streptomycetes*. Genome biology and evolution, 2016. **8**(6): p. 1906-1916.
55. Wang, L.-H., et al., *Membrane and genomic DNA dual-targeting of citrus flavonoid naringenin against Staphylococcus aureus*. Integrative Biology, 2017. **9**(10): p. 820-829.
56. Kleijn, L.H., et al., *Total synthesis of Laspartomycin C and characterization of its antibacterial mechanism of action*. Journal of medicinal chemistry, 2016. **59**(7): p. 3569-3574.
57. Rui, Z., et al., *Biochemical and genetic insights into asukamycin biosynthesis*. Journal of Biological Chemistry, 2010. **285**(32): p. 24915-24924.
58. Li, C., X. Li, and R. Hong, *Synthetic Study on Tetrapetalones: Stereoselective Cyclization of N-Acyliminium Ion To Construct Substituted 1-Benzazepines*. Organic letters, 2009. **11**(18): p. 4036-4039.
59. Luo, Y., et al., *Activation and characterization of a cryptic polycyclic tetramate macrolactam biosynthetic gene cluster*. Nature communications, 2013. **4**(1): p. 1-8.
60. Smanski, M.J., et al., *Engineered <em>Streptomyces platensis</em> Strains That Overproduce Antibiotics Platensimycin and Platencin*. Antimicrobial Agents and Chemotherapy, 2009. **53**(4): p. 1299.
61. Burke, J., D. Schneider, and J. Westpheling, *Generalized transduction in <em>Streptomyces coelicolor</em>*. Proceedings of the National Academy of Sciences, 2001. **98**(11): p. 6289.
62. Ackermann, H.-W., *5500 Phages examined in the electron microscope*. Archives of virology, 2007. **152**(2): p. 227-243.
63. Jin, H., et al., *Capsid Structure of a Freshwater Cyanophage Siphoviridae Mic1*. Structure, 2019. **27**(10): p. 1508-1516. e3.
64. Couvin, D., et al., *CRISPRCasFinder, an update of CRISPRFinder, includes a portable version, enhanced performance and integrates search for Cas proteins*. Nucleic acids research, 2018. **46**(W1): p. W246-W251.
65. Abby, S.S., et al., *MacSyFinder: a program to mine genomes for molecular systems with an application to CRISPR-Cas systems*. PloS one, 2014. **9**(10).
66. Zhang, Q. and Y. Ye, *Not all predicted CRISPR-Cas systems are equal: isolated cas genes and classes of CRISPR like elements*. BMC bioinformatics, 2017. **18**(1): p. 92.
67. Zhang, F., et al., *CRISPRminer is a knowledge base for exploring CRISPR-Cas systems in microbe and phage interactions*. Communications Biology, 2018. **1**(1): p. 1-5.
68. Biswas, A., et al., *CRISPRDetect: a flexible algorithm to define CRISPR arrays*. BMC genomics, 2016. **17**(1): p. 356.
69. Faure, G., et al., *CRISPR-Cas in mobile genetic elements: counter-defence and beyond*. Nature Reviews Microbiology, 2019. **17**(8): p. 513-525.
70. Brettin, T., et al., *RASTtk: A modular and extensible implementation of the RAST algorithm for building custom annotation pipelines and annotating batches of genomes*. Scientific Reports, 2015. **5**(1): p. 8365.
71. Cresawn, S.G., et al., *Phamerator: a bioinformatic tool for comparative bacteriophage genomics*. BMC Bioinformatics, 2011. **12**(1): p. 395.
72. Janda, J.M. and S.L. Abbott, *16S rRNA Gene Sequencing for Bacterial Identification in the Diagnostic Laboratory: Pluses, Perils, and Pitfalls*. Journal of Clinical Microbiology, 2007. **45**(9): p. 2761.



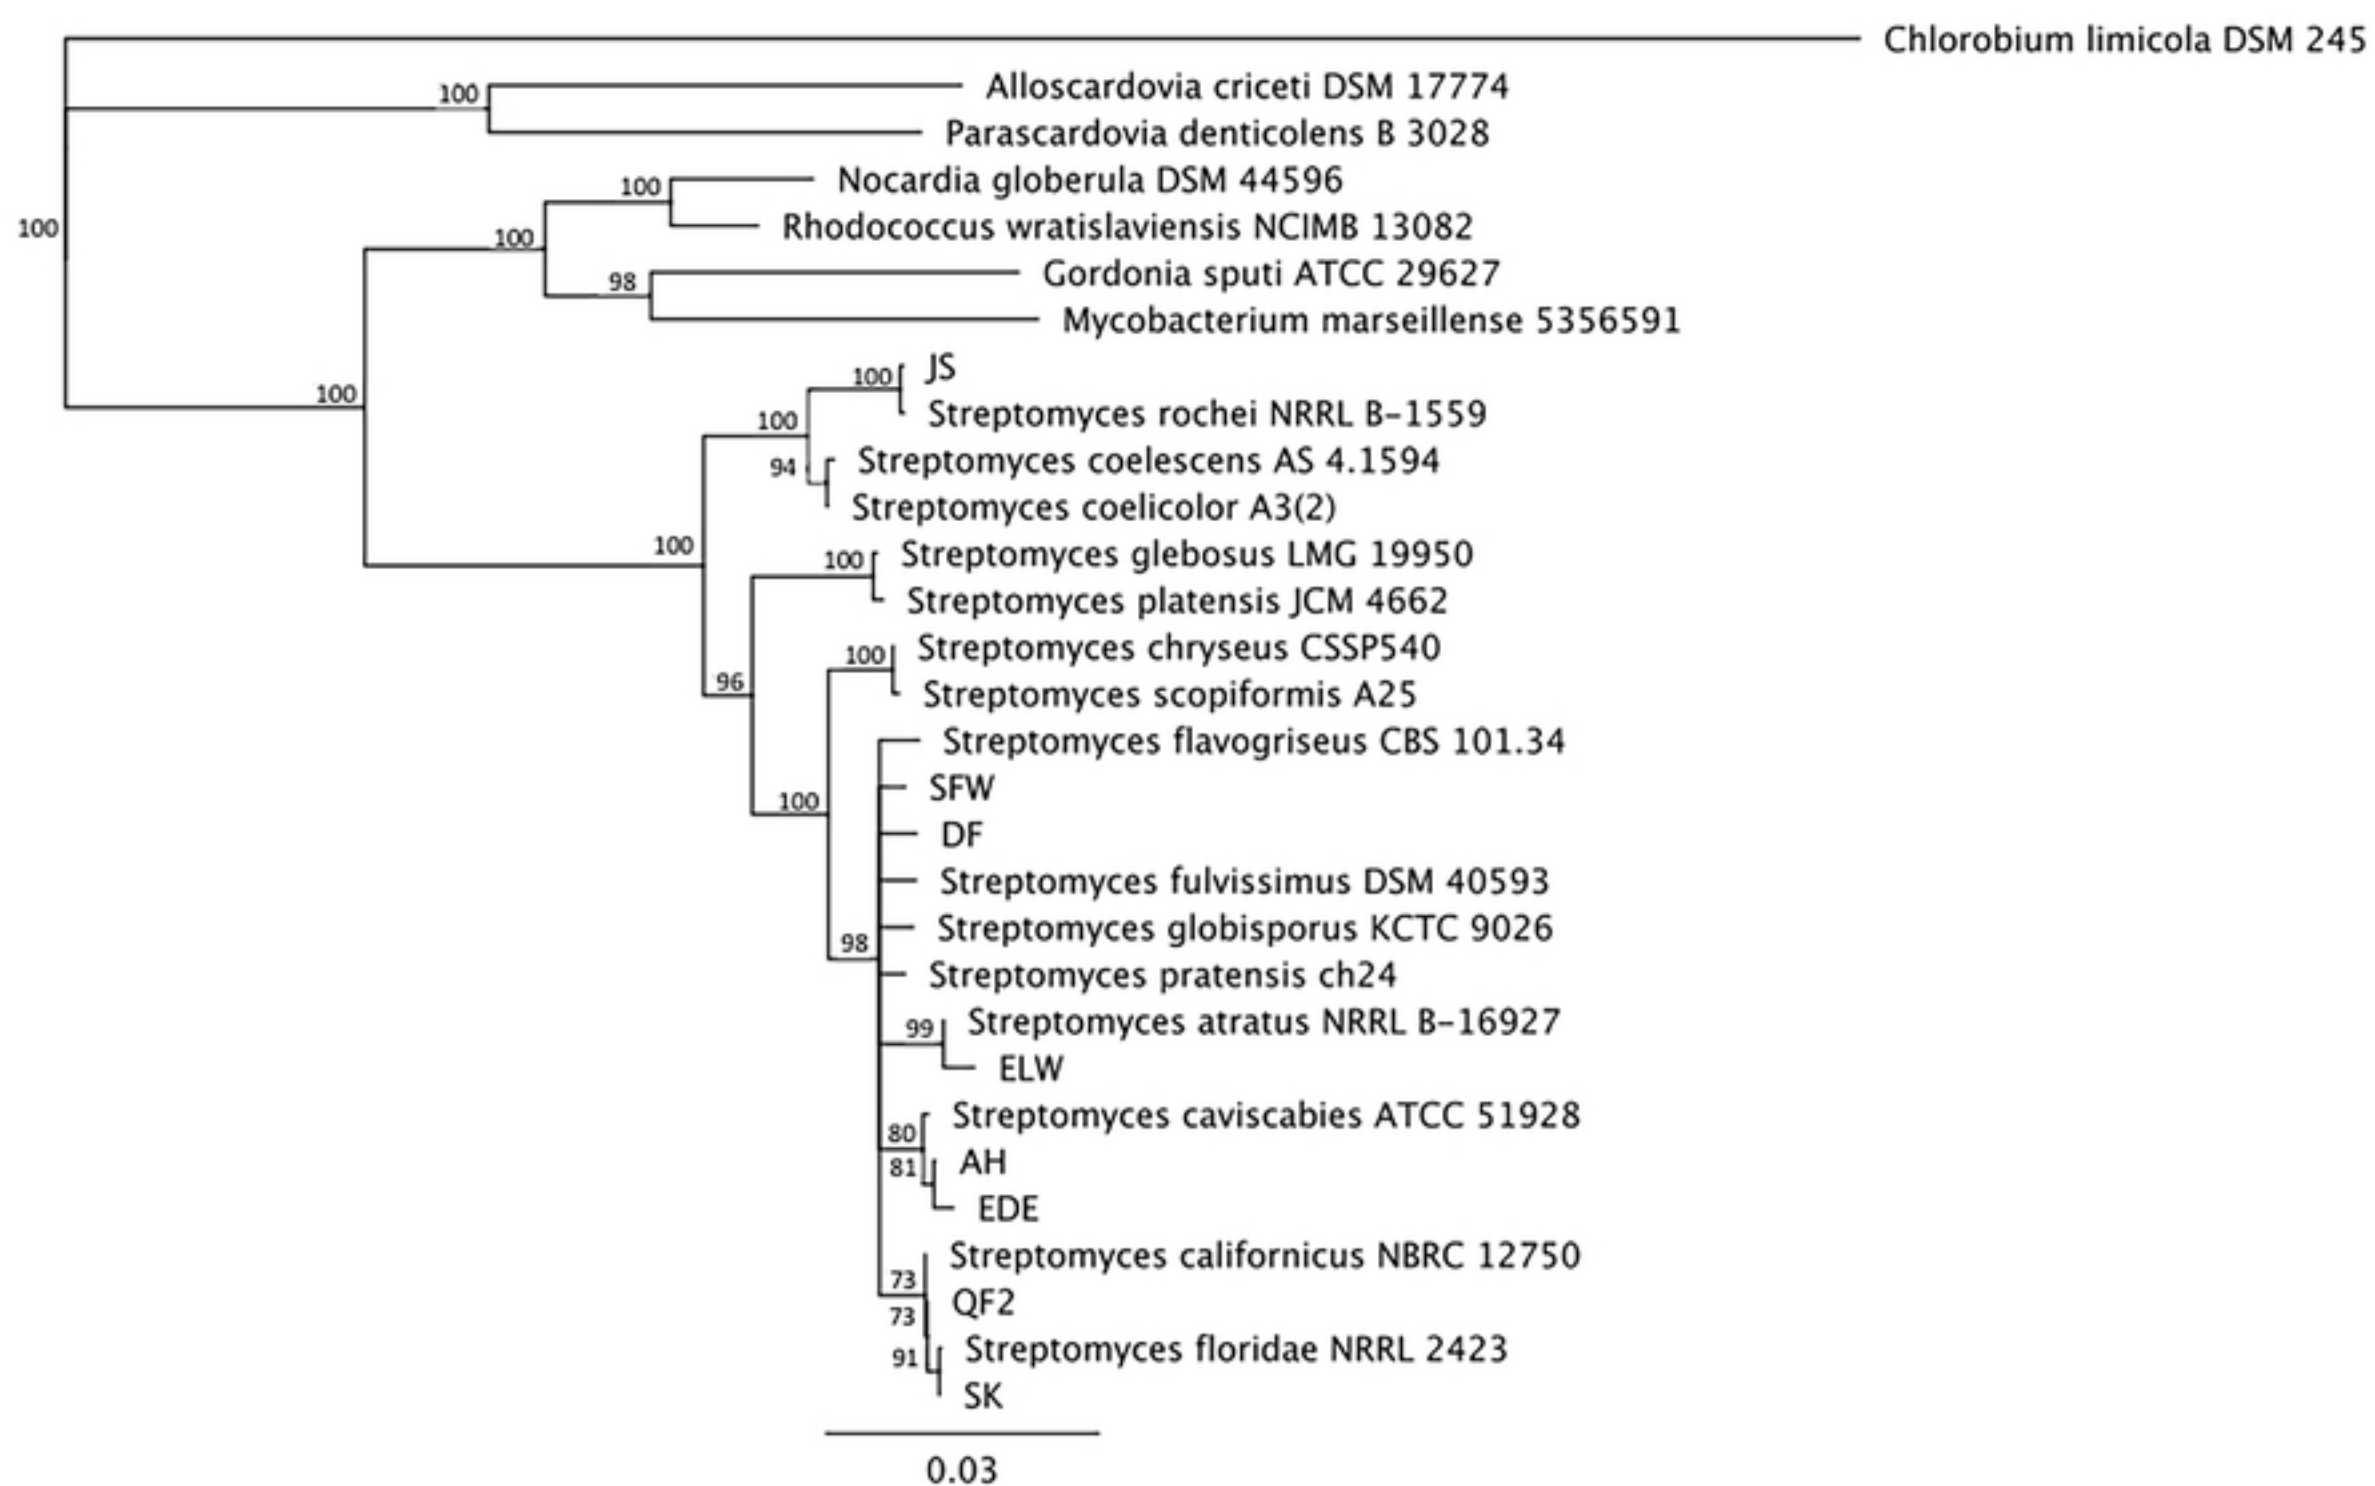

Figure 1

A.

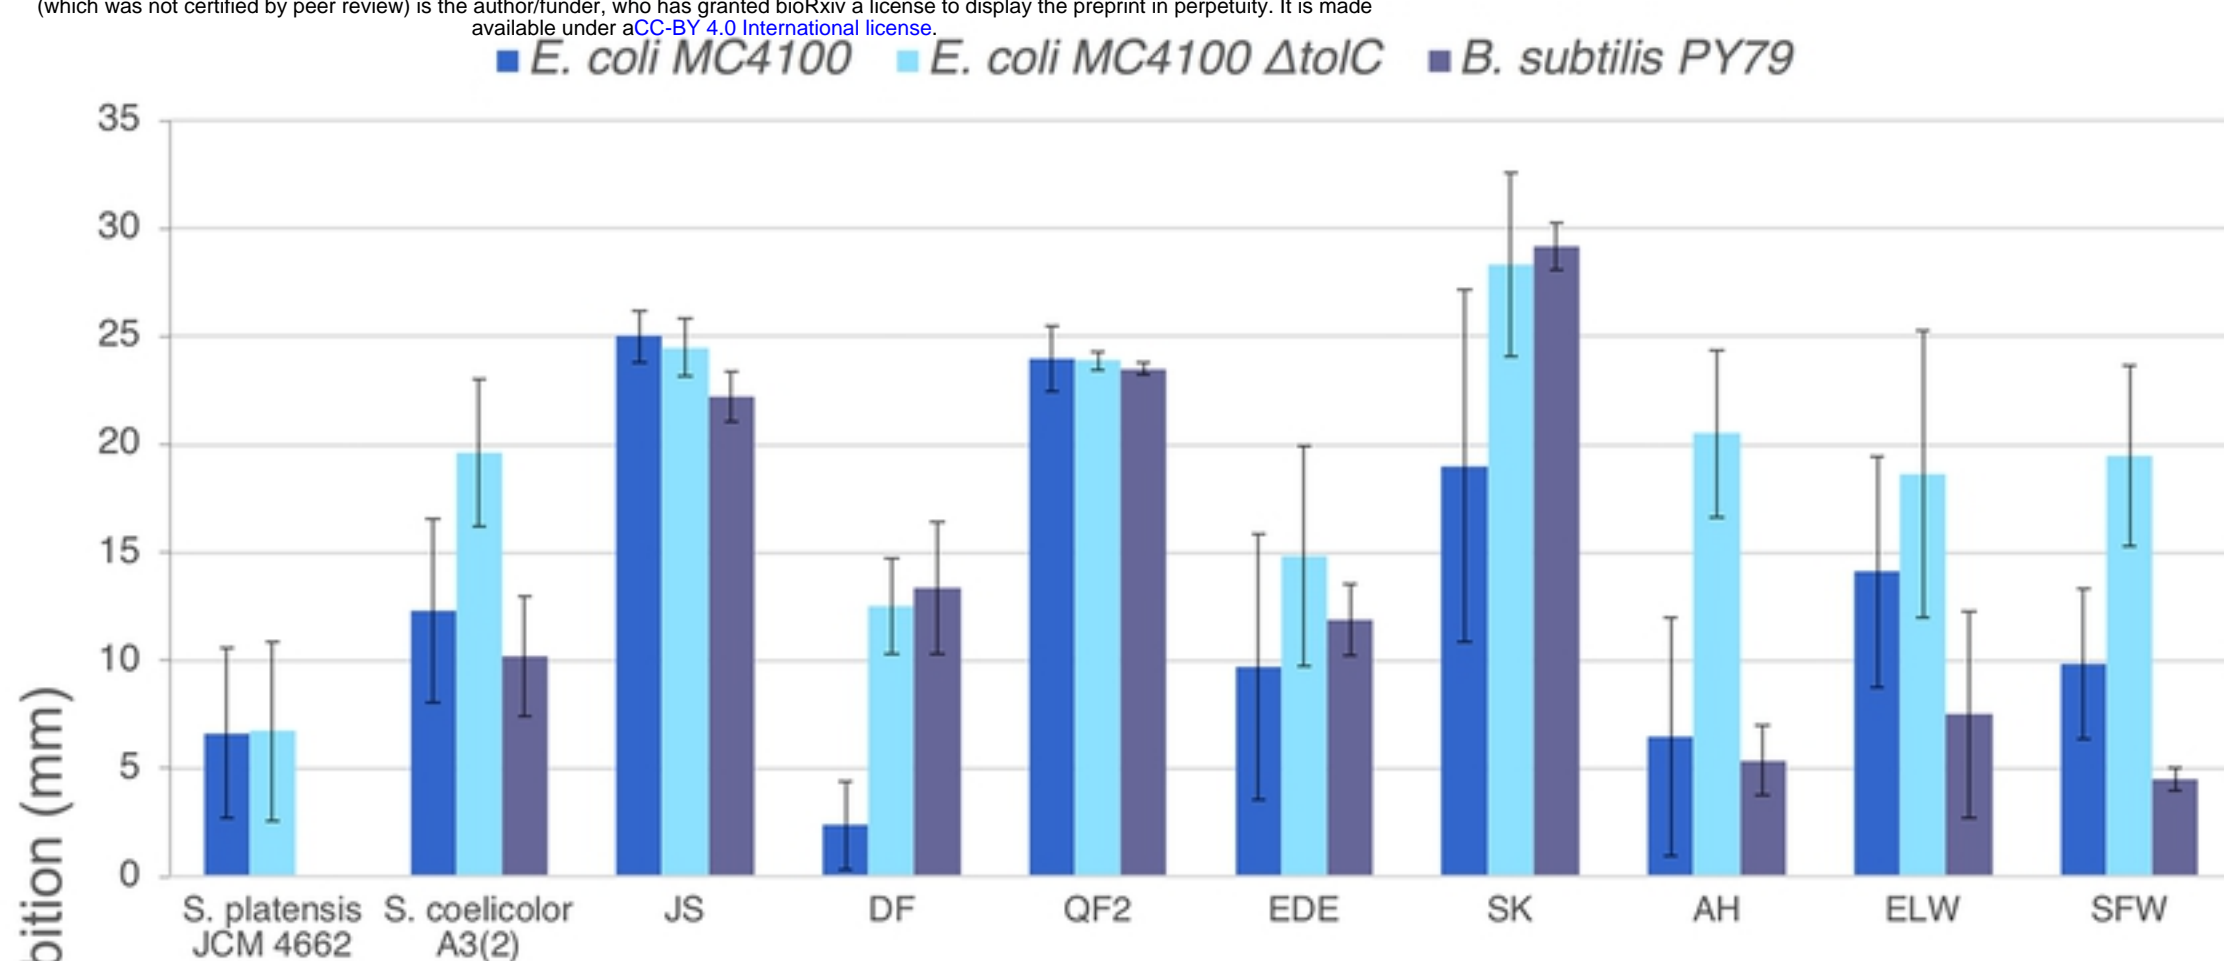

B.

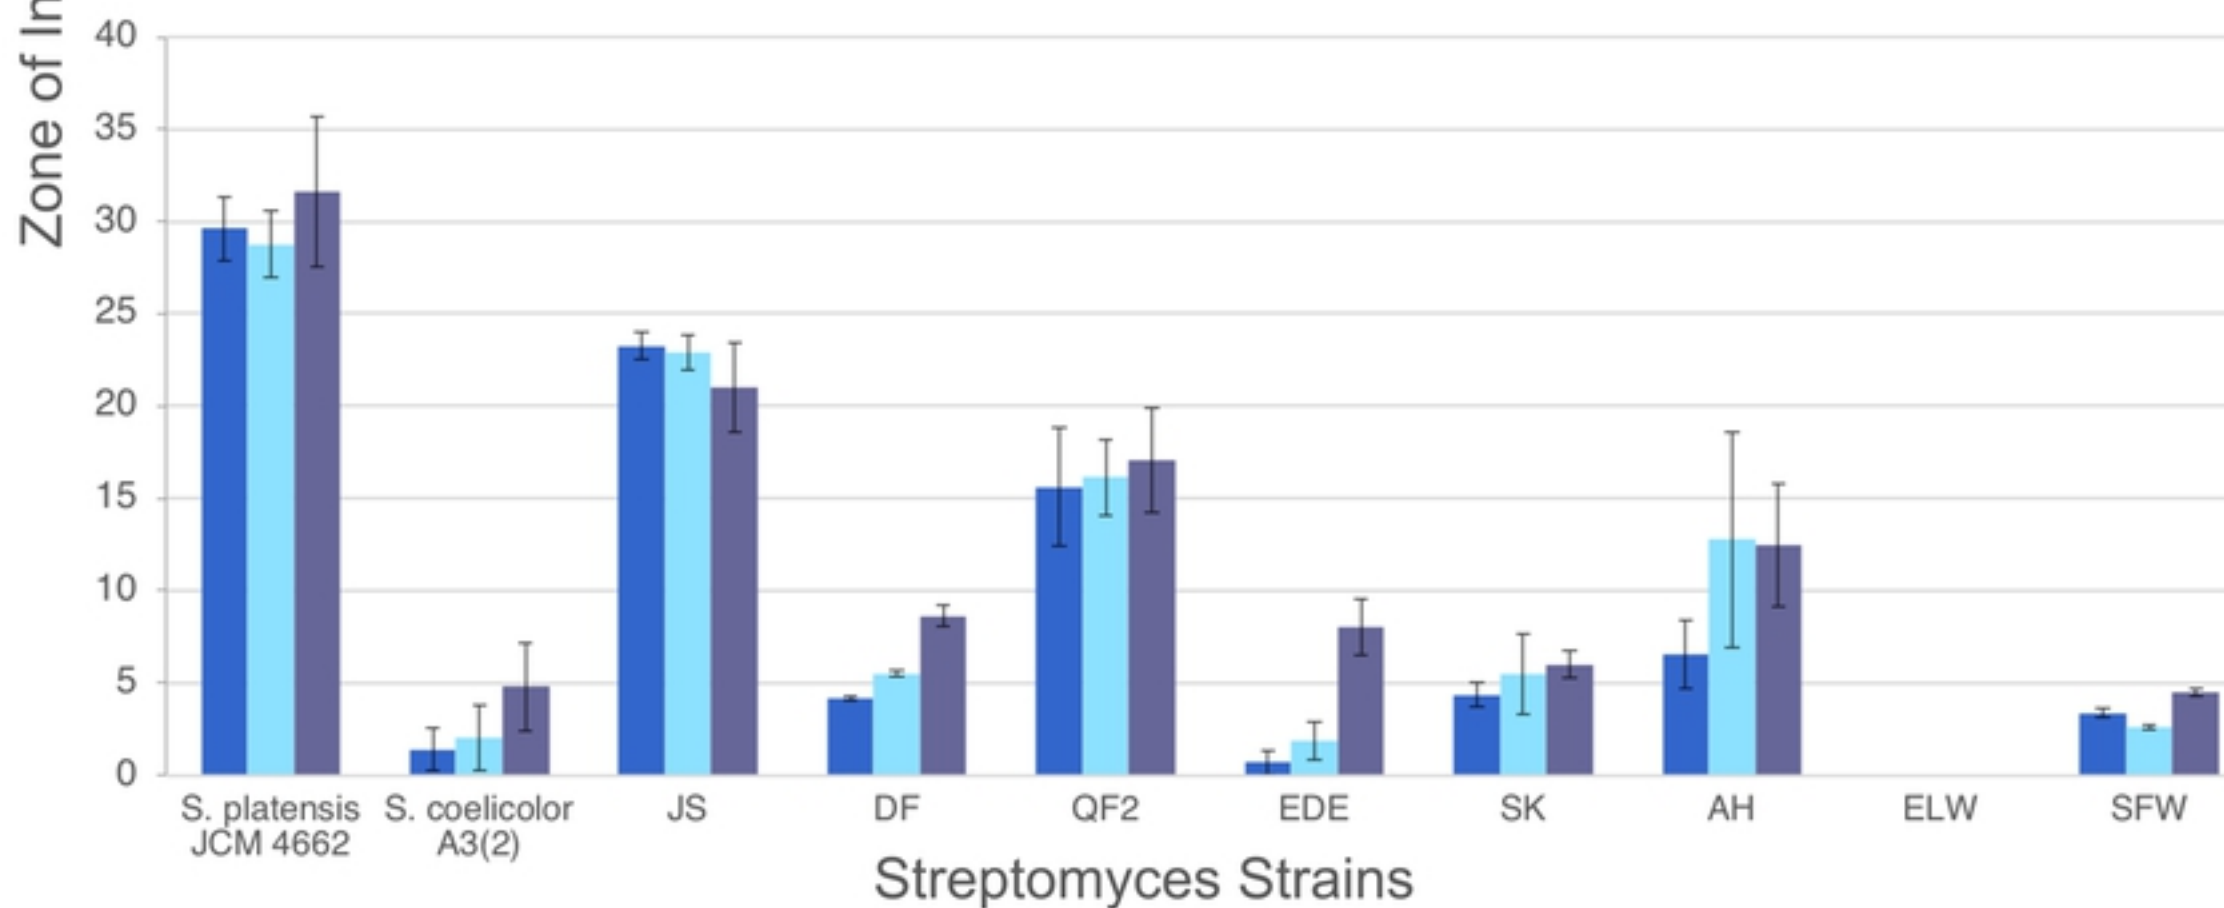

Figure 2

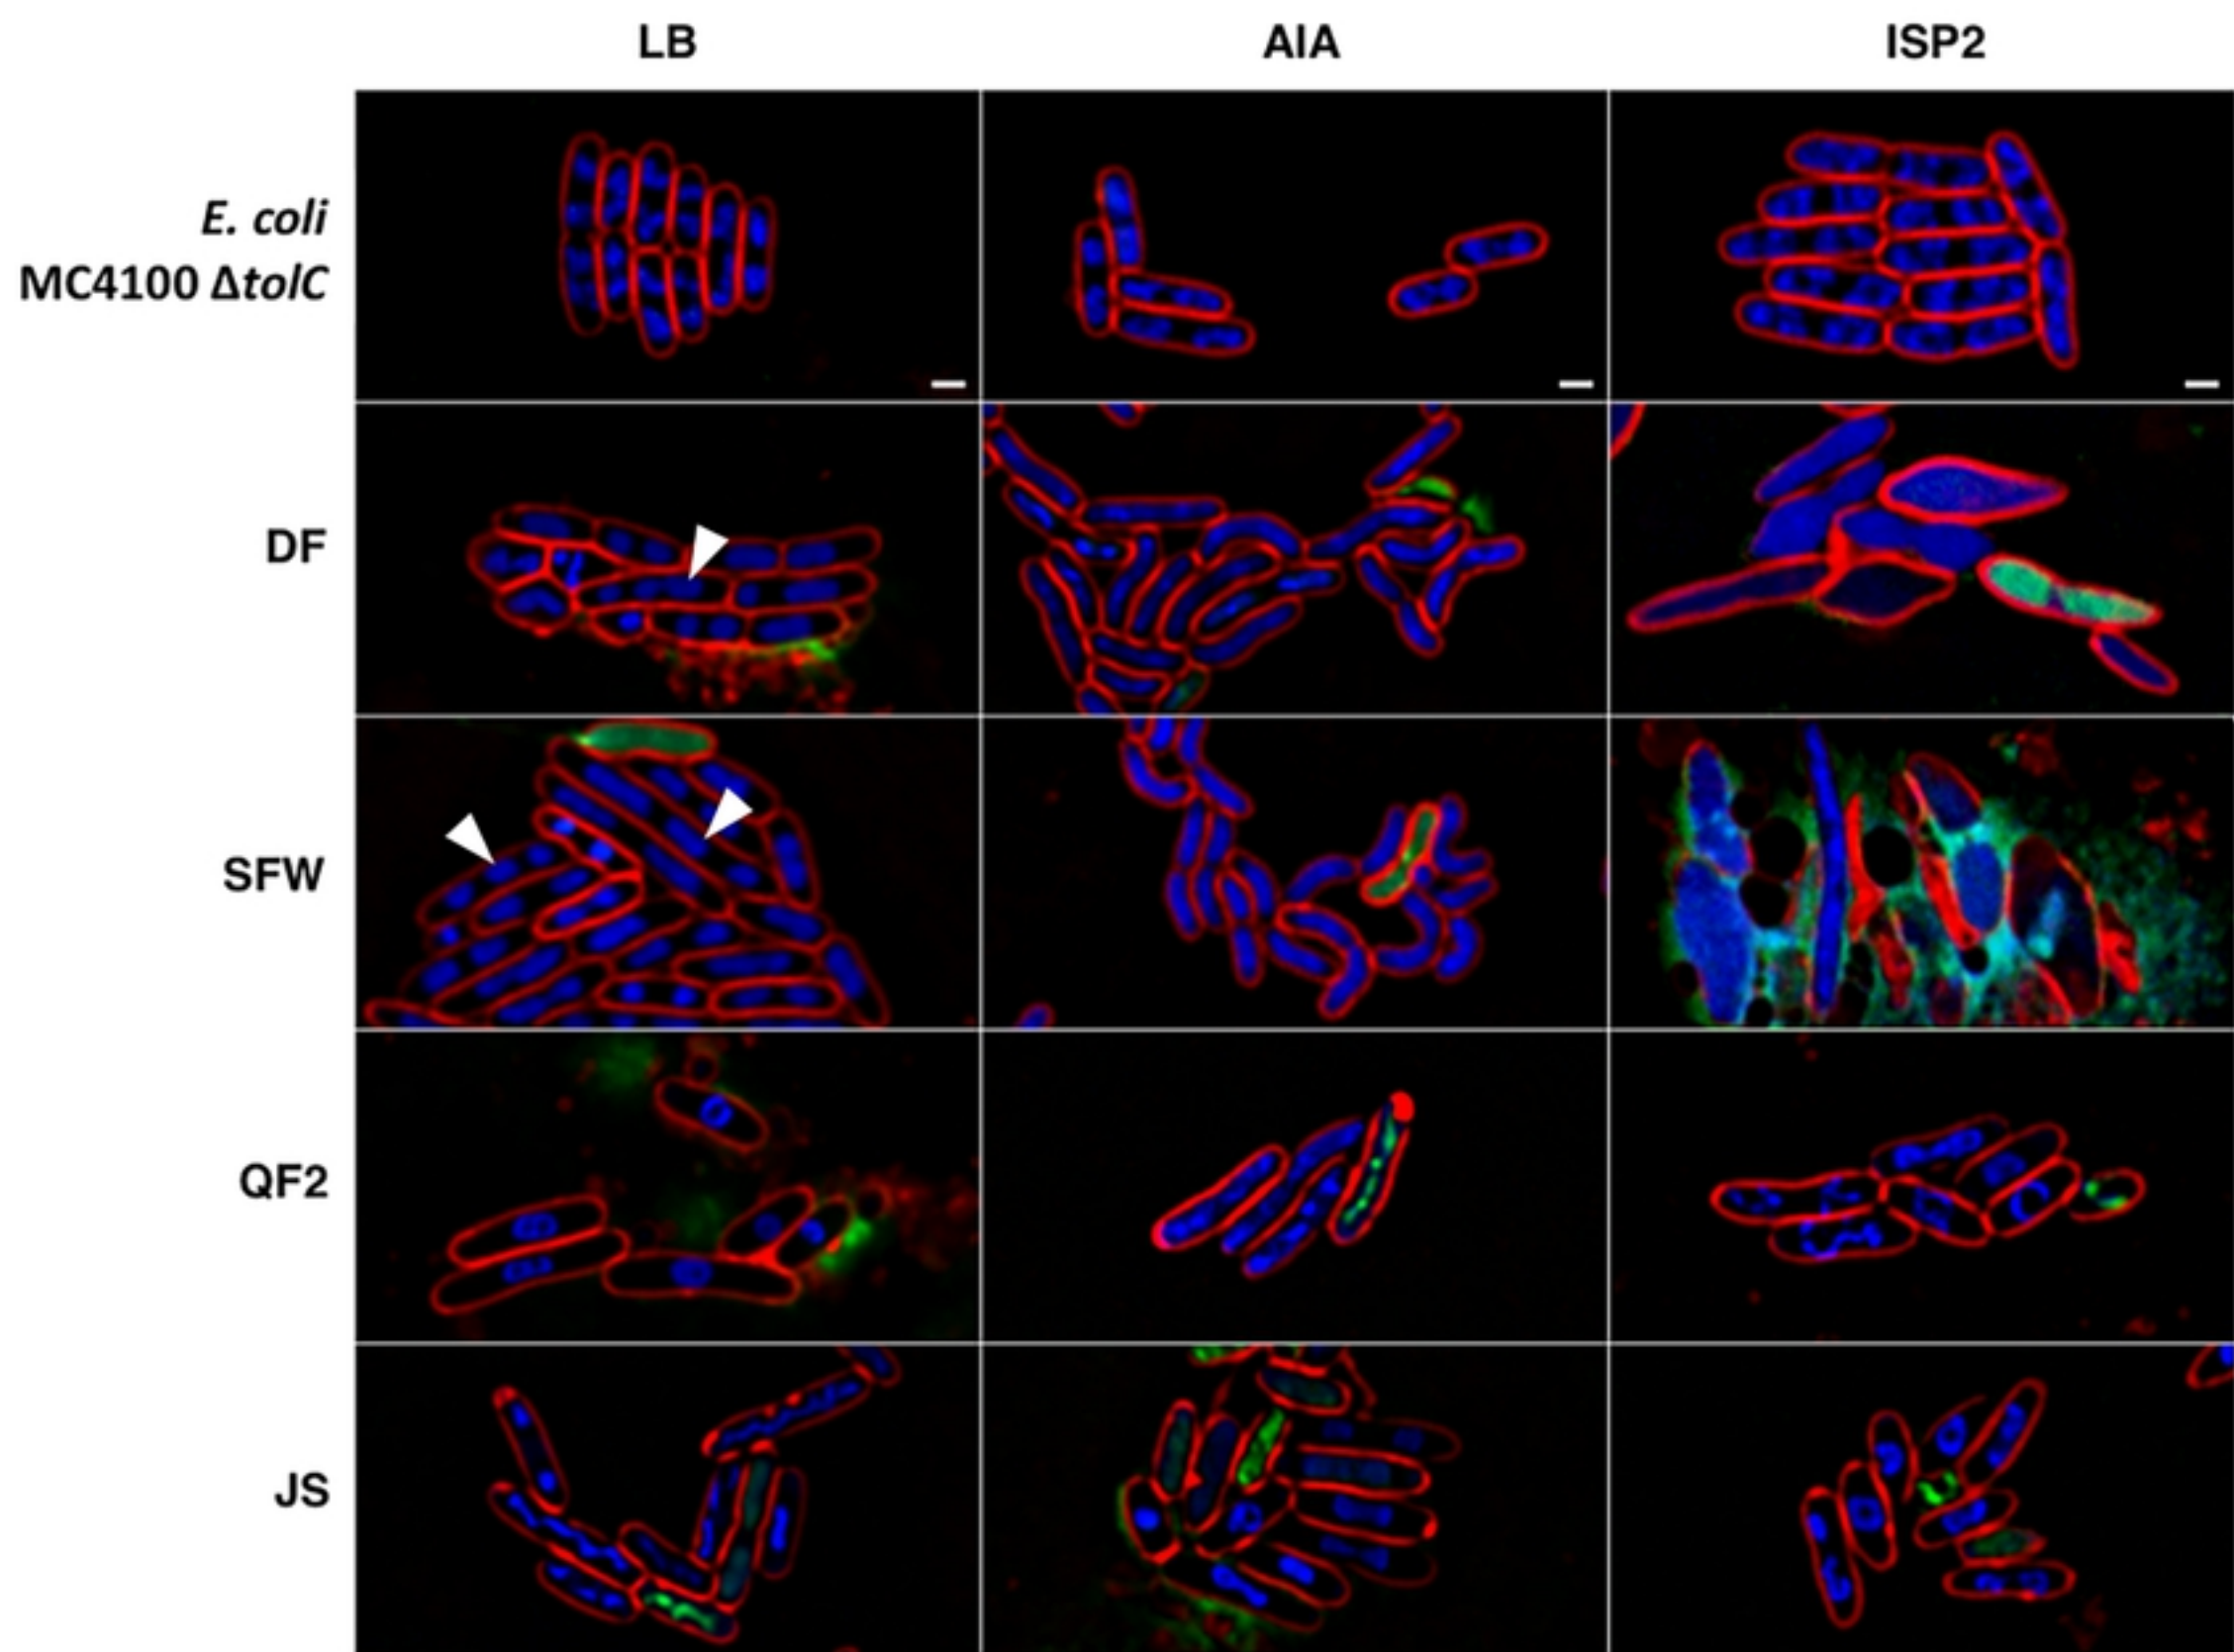

Figure 3



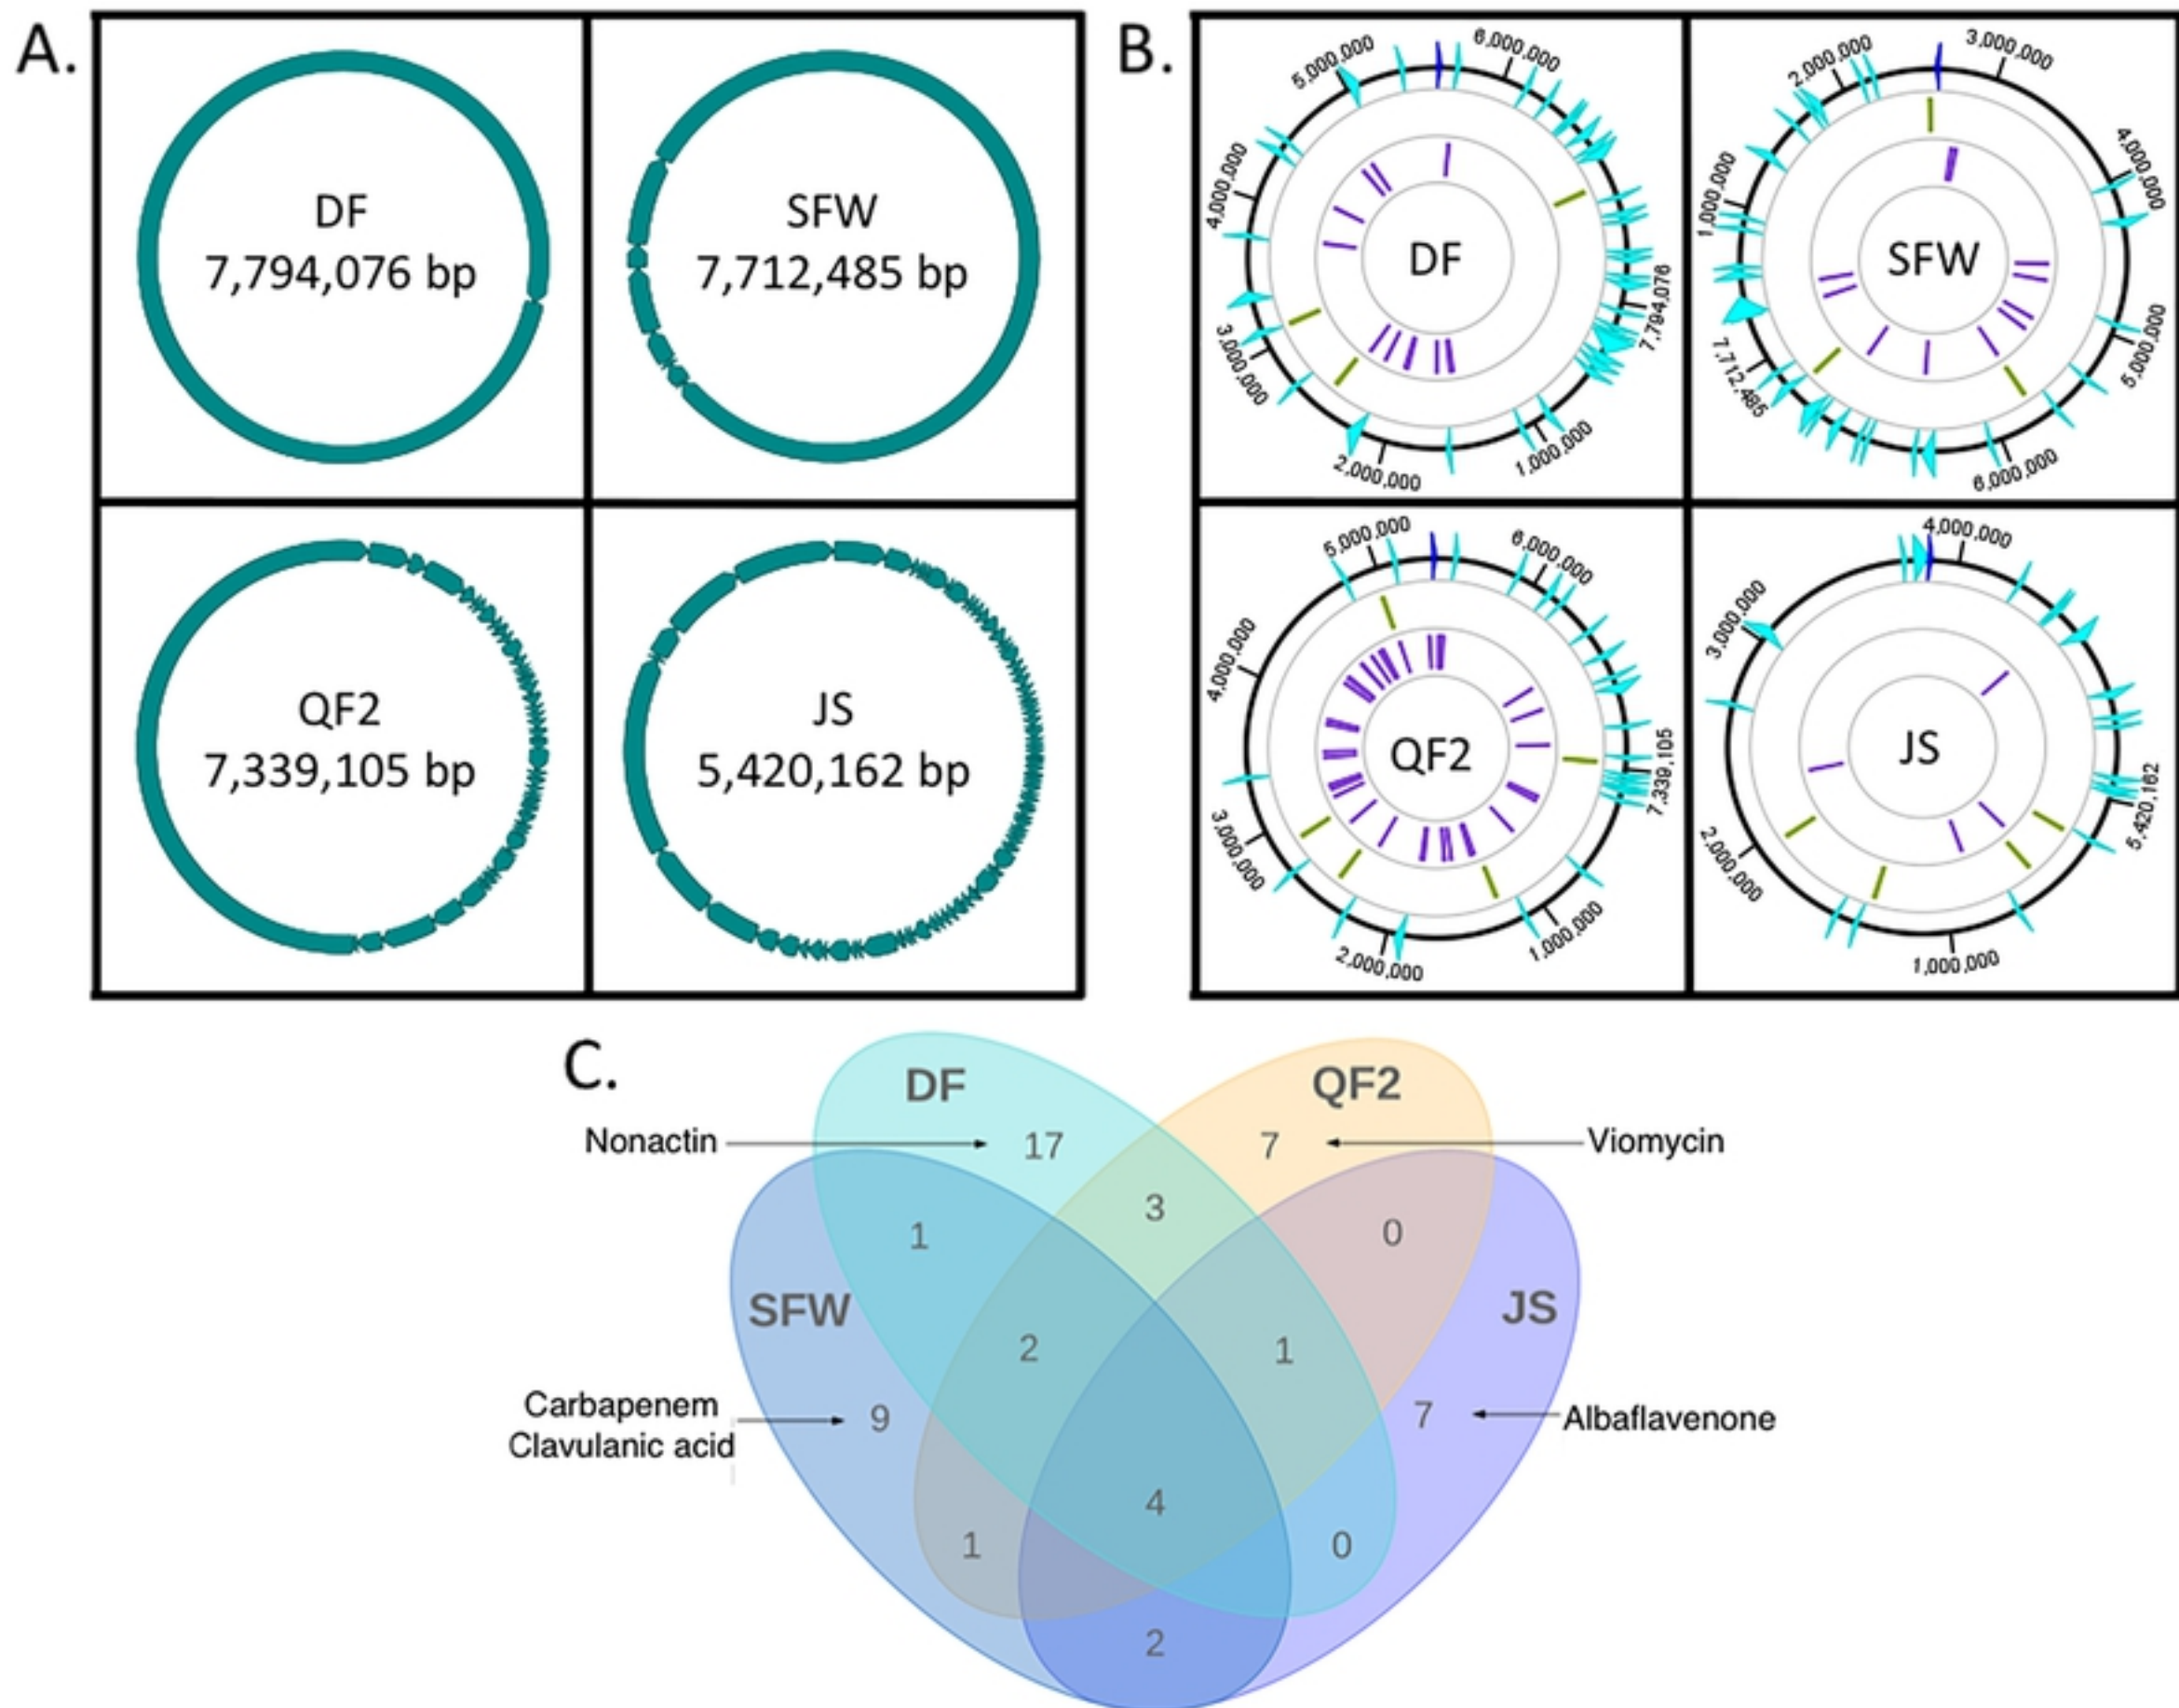

Figure 4

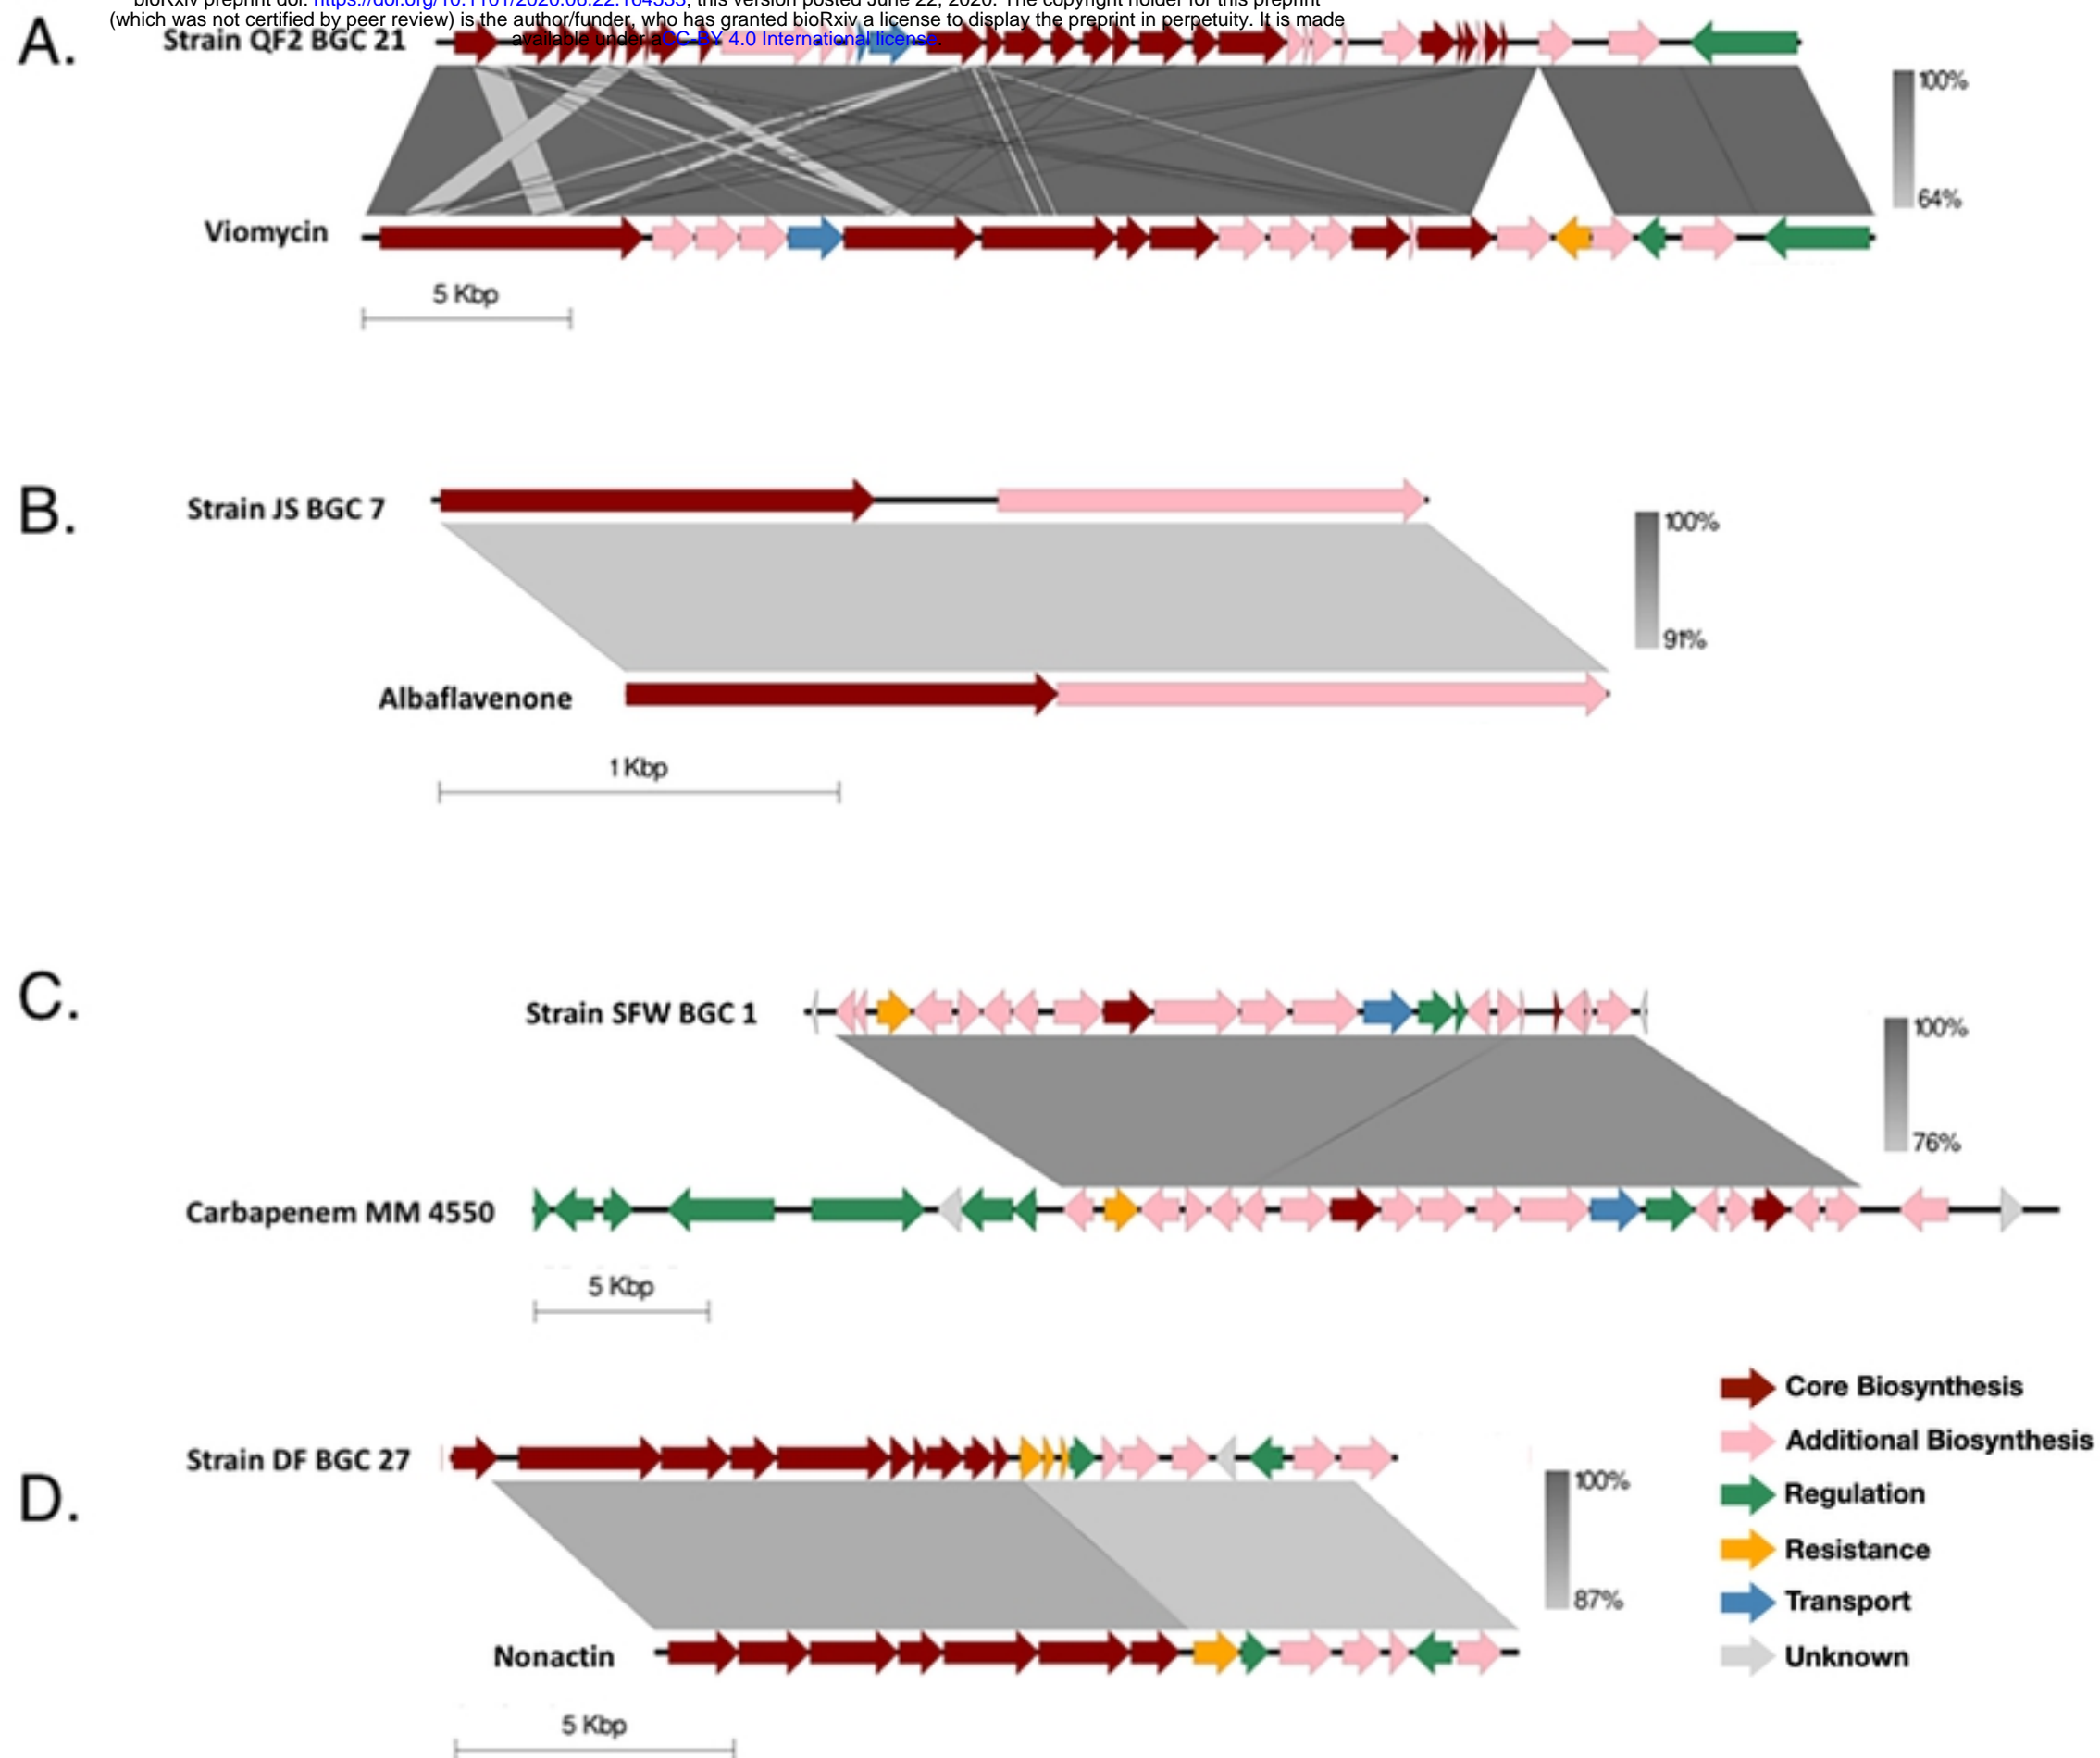

Figure 5



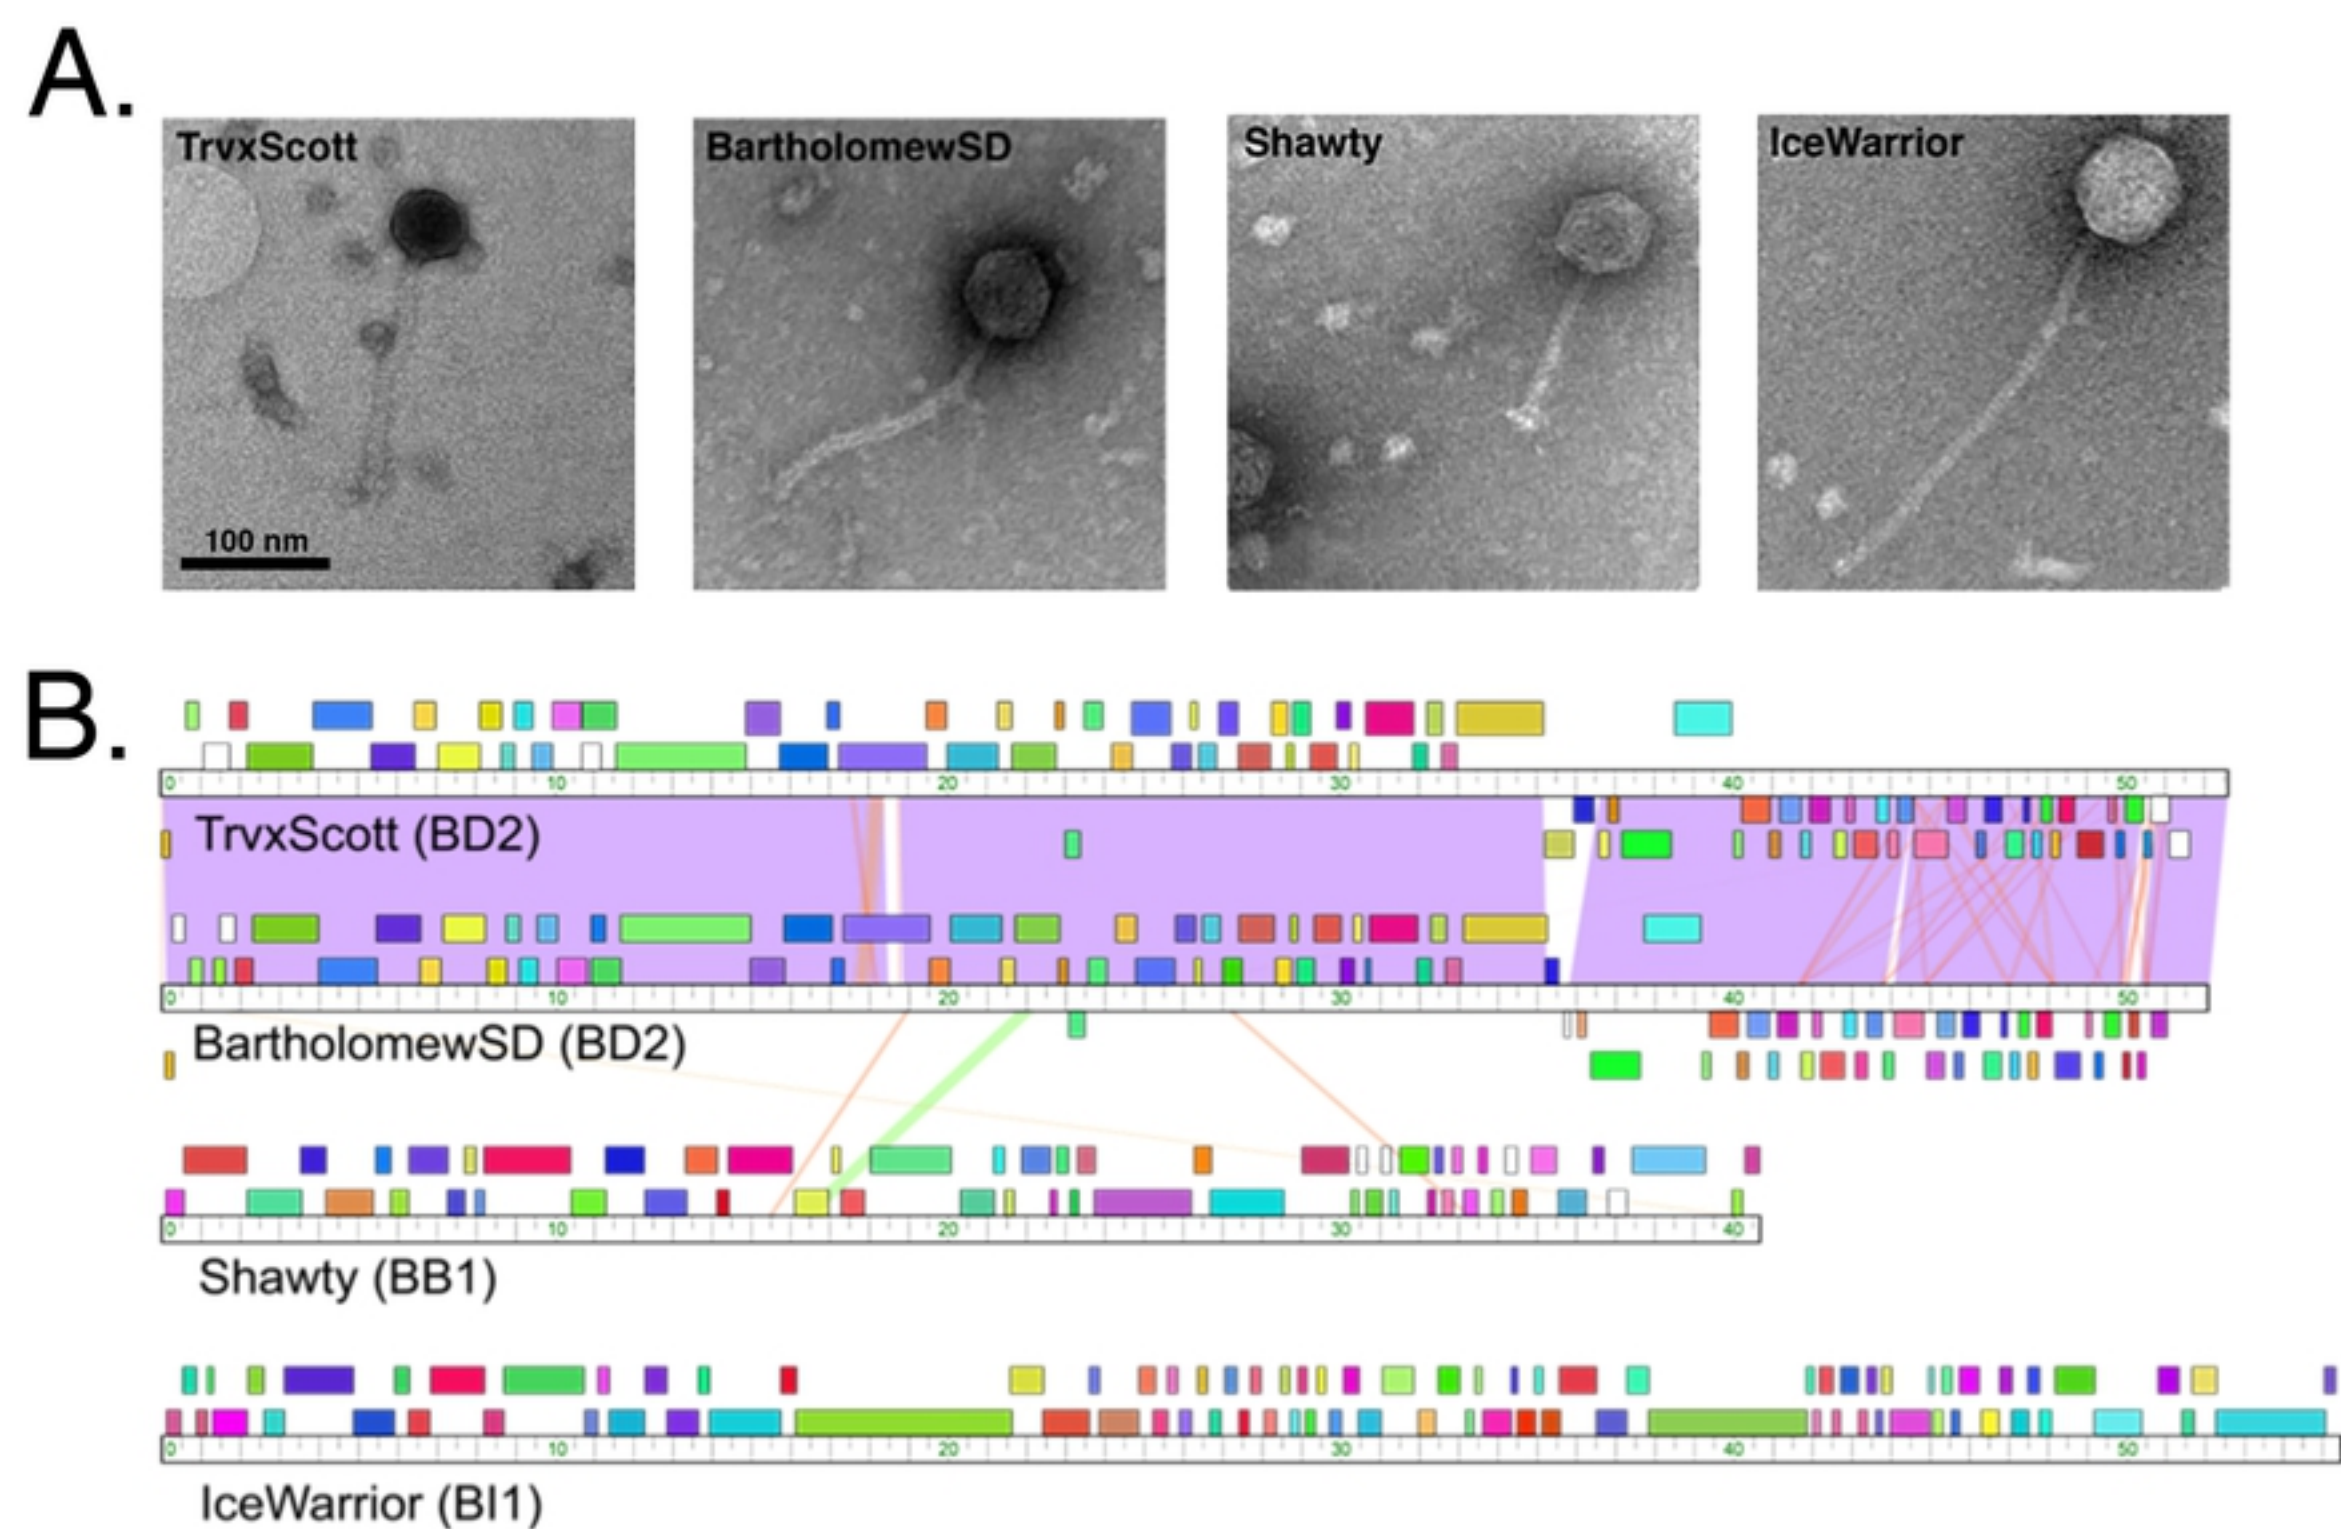

Figure 6

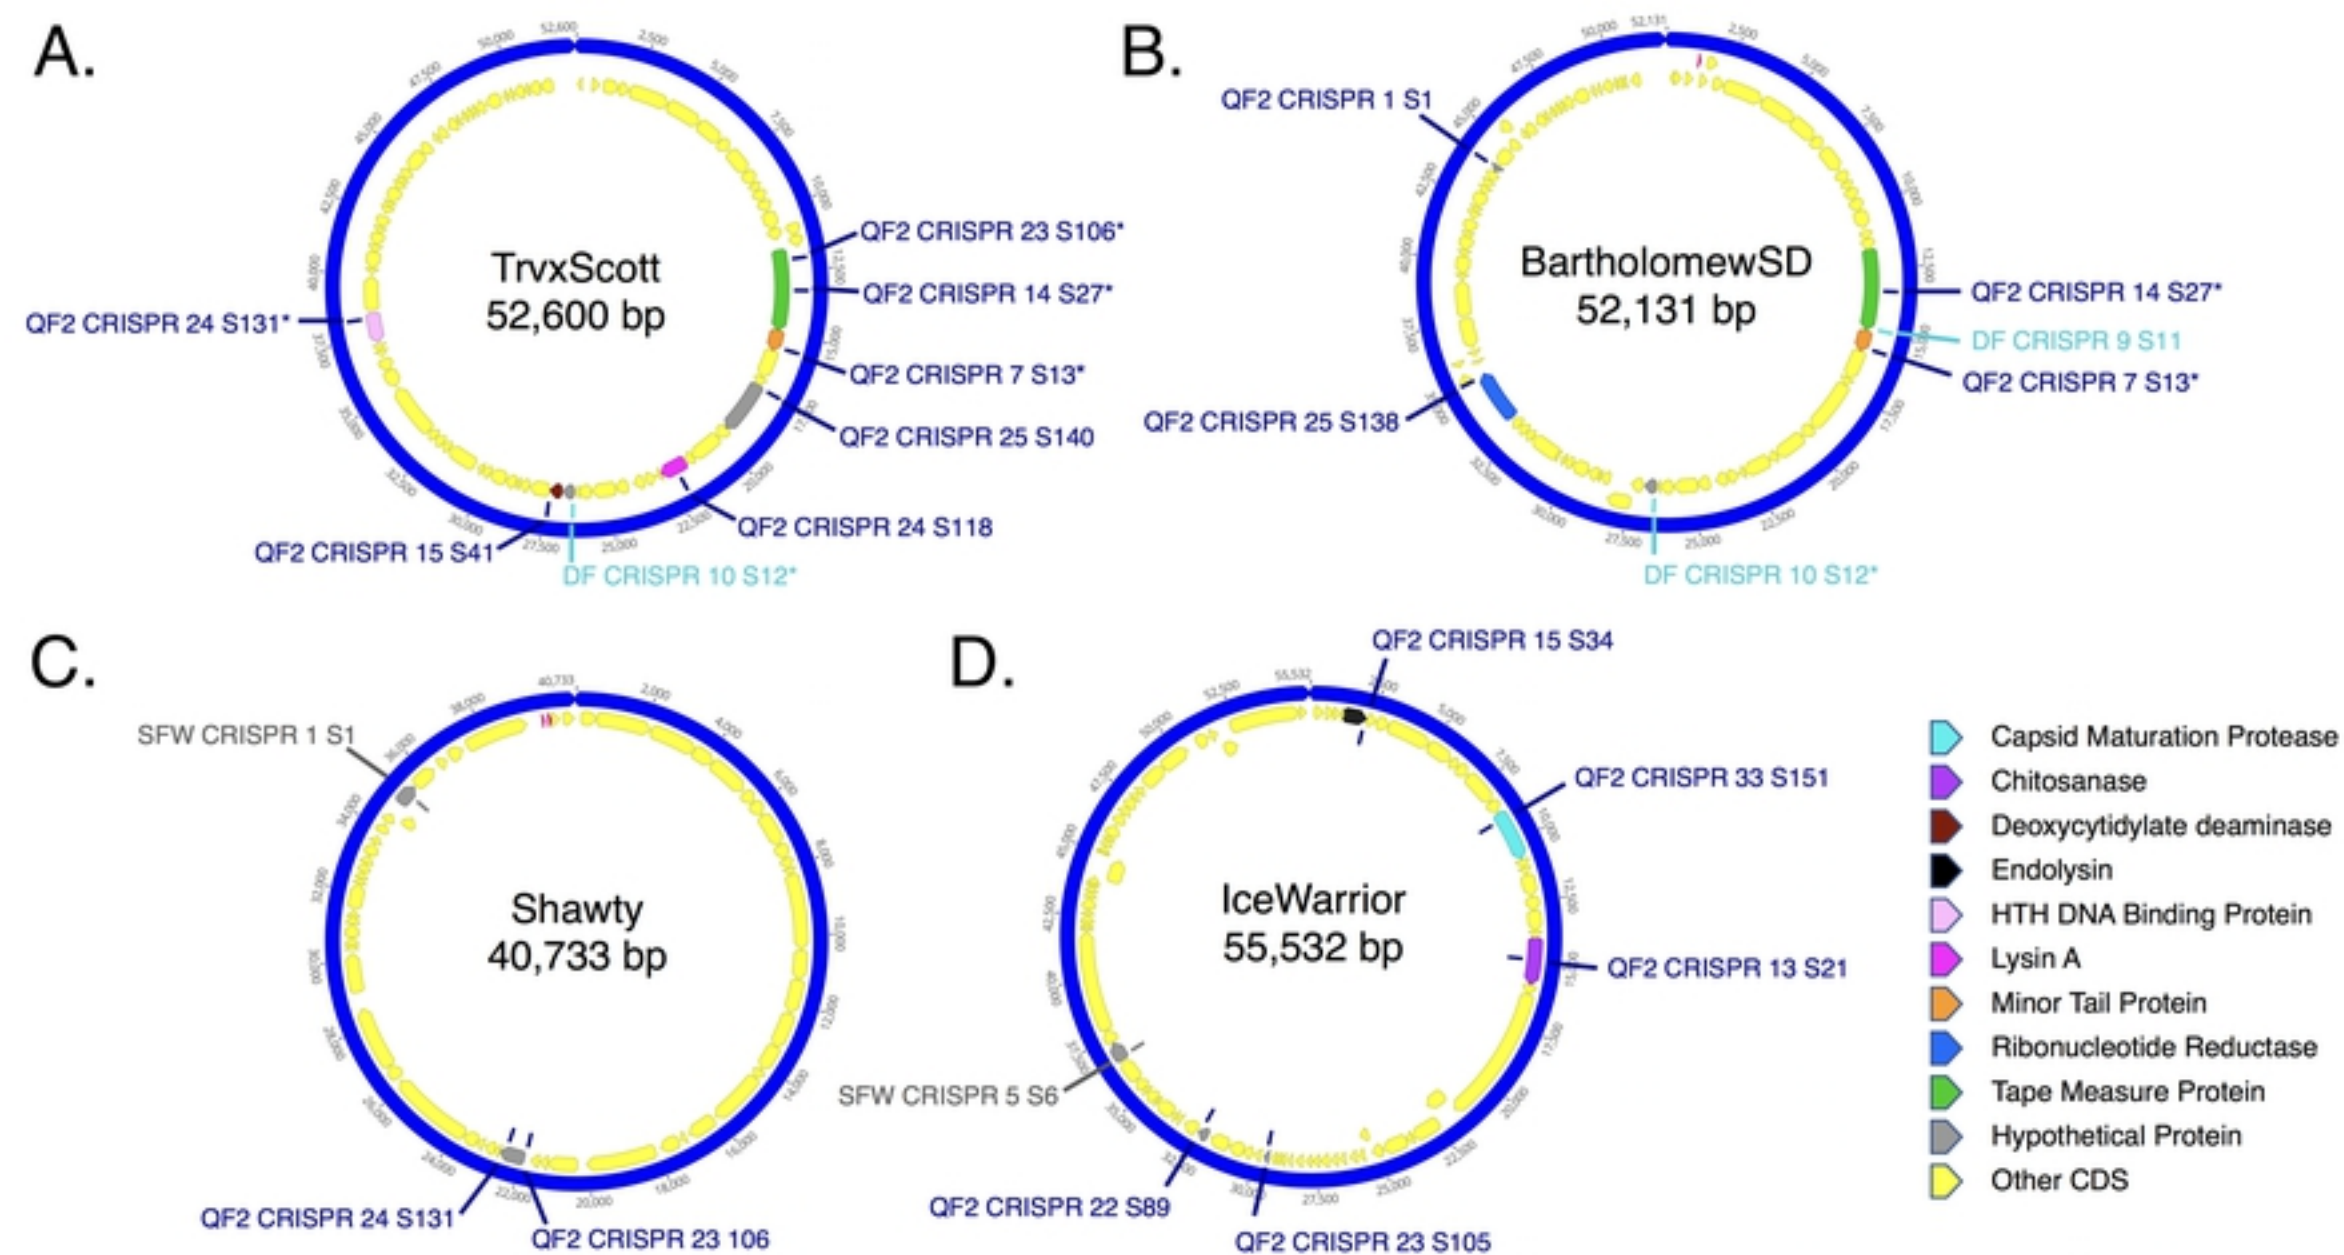

Figure 7

## Type I-E CRISPR-Cas System

Strain QF2

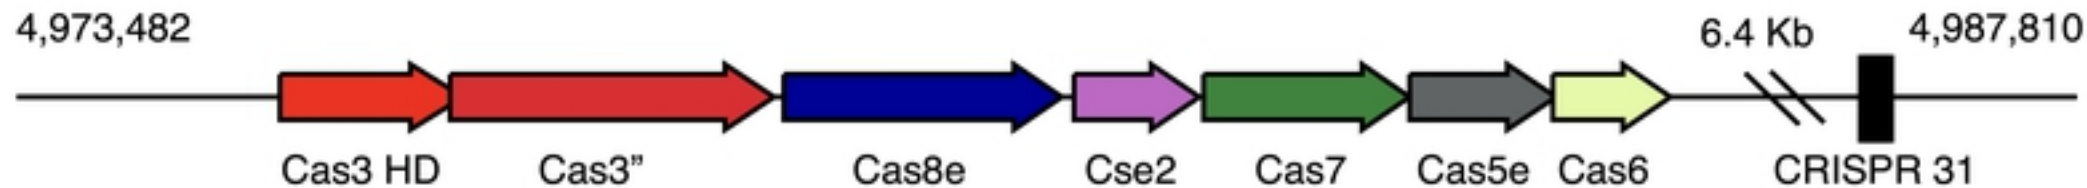

*E. coli* K-12 MG1655

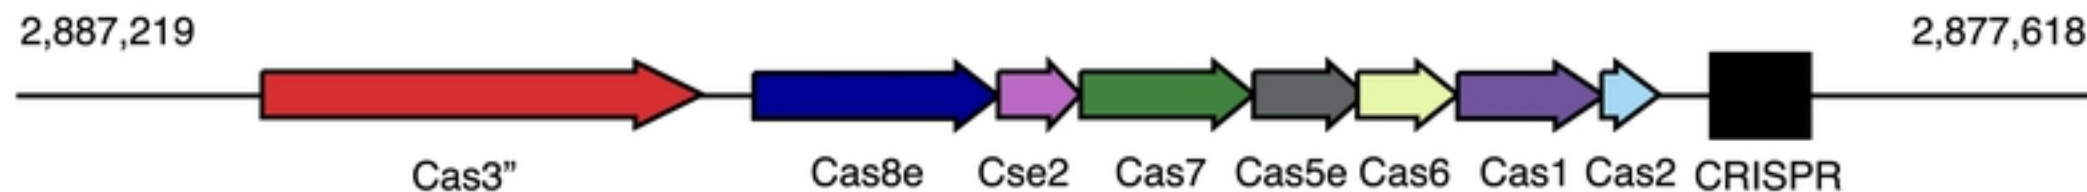

Figure 8
